# Supplementary material for: Fluorescence behavior of 5,10-disubstituted [5]helicene derivatives in solution and the effect of self-assembly on their radiative and non-radiative rate constants
Source: Royal Society of Chemistry journal article supplement (doi:10.1039/c5tc03675e), 2016-01-01
Supplement: c5tc03675e1.pdf [file c5tc03675e1.pdf]

## Supporting Information

# Fluorescence behavior of 5,10-disubstituted [5]helicene derivatives in solution and the effect of self-assembly on their radiative and non-radiative rate constants

Takashi Hirose,<sup>a</sup> Natsuki Ito,<sup>a</sup> Hiromu Kubo,<sup>a</sup> Tohru Sato<sup>b,c</sup> and Kenji Matsuda<sup>\*a</sup>

<sup>a</sup> Department of Synthetic Chemistry and Biological Chemistry, Graduate School of Engineering, Kyoto University, Katsura, Nishikyo-ku, Kyoto 615-8510, Japan

<sup>b</sup> Department of Molecular Engineering, Graduate School of Engineering, Kyoto University, Katsura, Nishikyo-ku, Kyoto 615-8510, Japan

<sup>c</sup> Unit of Elements Strategy Initiative for Catalysts & Batteries, Kyoto University, Katsura, Nishikyo-ku, Kyoto 615-8510, Japan

E-mail: kmatsuda@sbchem.kyoto-u.ac.jp

## Contents:

### Experimental Details

|                                               |    |
|-----------------------------------------------|----|
| A. Synthesis and Materials                    | S1 |
| B. UV-vis., CD, and Fluorescence Spectroscopy | S2 |
| C. TEM measurements                           | S3 |
| D. DLS measurements                           | S3 |
| E. Theoretical calculations                   | S3 |

### Supporting Data

|                        |                                                                                                                         |     |
|------------------------|-------------------------------------------------------------------------------------------------------------------------|-----|
| <b>Figure S1.</b>      | Temperature dependent absorption spectra of compound <b>3b</b> in hexane                                                | S4  |
| <b>Figure S2.</b>      | Isolation of enantiomer of compound <b>2a</b> by a chiral HPLC                                                          | S5  |
| <b>Figure S3.</b>      | Isolation of enantiomer of compound <b>3a</b> by a chiral HPLC                                                          | S6  |
| <b>Figure S4.</b>      | Calculated and experimental UV-vis and CD spectra of <b>2a</b> , <b>3a</b> , and <b>3b</b>                              | S7  |
| <b>Figure S5.</b>      | Circular dichroism and rate of helical inversion of <b>2a</b> and <b>3a</b>                                             | S8  |
| <b>Figure S6.</b>      | TEM images of aggregates composed of compound <b>2a</b>                                                                 | S9  |
| <b>Figure S7.</b>      | DLS measurement for an aqueous solution of compound <b>2a</b>                                                           | S10 |
| <b>Figure S8.</b>      | TEM images of aggregates composed of compound <b>3a</b>                                                                 | S11 |
| <b>Figure S9.</b>      | TEM images of aggregates composed of compound <b>3b</b>                                                                 | S12 |
| <b>Figure S10.</b>     | The change of fluorescence color upon aggregation on the CIE 1931 diagram                                               | S13 |
| <b>Table S1.</b>       | Fluorescence lifetime of compounds <b>1–3</b> in solution phase                                                         | S14 |
| <b>Figure S11–18.</b>  | Time-resolved fluorescence spectra using a streak scope                                                                 | S15 |
| <b>Table S2–S3.</b>    | Excited states of <b>3a</b> and <b>3b</b> calculated by TD-DFT method                                                   | S18 |
| <b>Figure S19–23.</b>  | Structural relaxation of <b>3a</b> and <b>3b</b> in the lowest energy excited state ( $S_1$ )                           | S19 |
| <b>Table S4.</b>       | Vibrational modes of <b>3a</b> and <b>3b</b> with large vibronic coupling                                               | S22 |
| <b>Figure S24–25.</b>  | Diagonal VCD analysis for the $S_1$ Franck-Condon state of <b>3a</b> and <b>3b</b>                                      | S22 |
| <b>Figure S26.</b>     | Off-diagonal VCC for the normal modes of <b>3a</b> and <b>3b</b>                                                        | S23 |
| <b>Table S5.</b>       | Vibrational modes of <b>3a</b> and <b>3b</b> with large VCC between $S_1$ and $S_0$ states                              | S23 |
| <b>Figure S27–S28.</b> | Off-diagonal VCD analysis for the $S_1$ adiabatic state and $S_0$ state of <b>3a</b> and <b>3b</b>                      | S24 |
| <b>Figure S29.</b>     | Fragment molecular orbital (FMO) analysis of <b>3a</b> and <b>3b</b>                                                    | S25 |
| <b>Figure S30–S39.</b> | $^1\text{H}$ and $^{13}\text{C}$ NMR spectra of compounds <b>1b</b> , <b>4b</b> , <b>2a</b> , <b>3a</b> , and <b>3b</b> | S26 |

|                   |     |
|-------------------|-----|
| <b>References</b> | S31 |
|-------------------|-----|

## Experimental details

### A. Synthesis and Materials

#### 1,4-Bis(2-cyano-2-(3-methoxyphenyl)ethenyl)-2,3-dimethoxybenzene (**6b**).

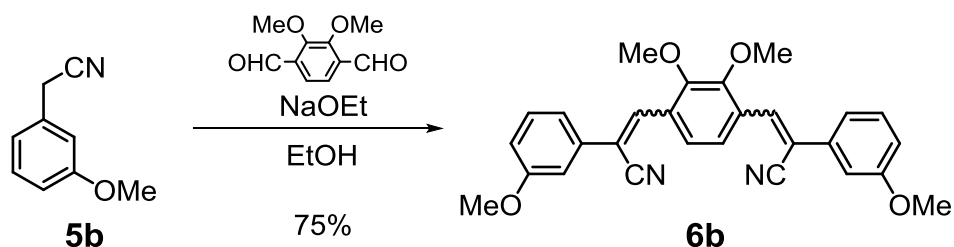

To a solution of 1,4-diformyl-2,3-dimethoxybenzene (310 mg, 1.6 mmol) and 3-methoxyphenylacetonitrile (**5b**) (520 mg, 3.5 mmol) in dry ethanol (15 mL) was added sodium ethoxide (320 mg, 4.6 mmol). The reaction mixture was stirred for 1 h at 50 °C. After cooling to room temperature, precipitates were filtered and washed with cold ethanol and water to give compound **6b** as a pale yellow powder (540 mg, 1.2 mmol, 75%, mixture of (*E,E*) and (*E,Z*) isomers).

<sup>1</sup>H NMR (CDCl<sub>3</sub>, 500 MHz,  $\delta$ ) 3.89 (6H, s), 3.92 (6H, s), 6.97 (2H, d,  $J$  = 8.9 Hz), 7.24 (2H, s), 7.32 (2H, d,  $J$  = 7.0 Hz), 7.39 (2H, t,  $J$  = 7.9 Hz), 7.89 (2H, s), 8.08 (2H, s); MALDI-HRMS  $m/z$  [M]<sup>+</sup> calcd for C<sub>28</sub>H<sub>24</sub>N<sub>2</sub>O<sub>4</sub><sup>+</sup>: 452.1731; found: 452.1702.

#### 5,10-Dicyano-3,7,8,12-tetramethoxy[5]helicene. (**1b**)

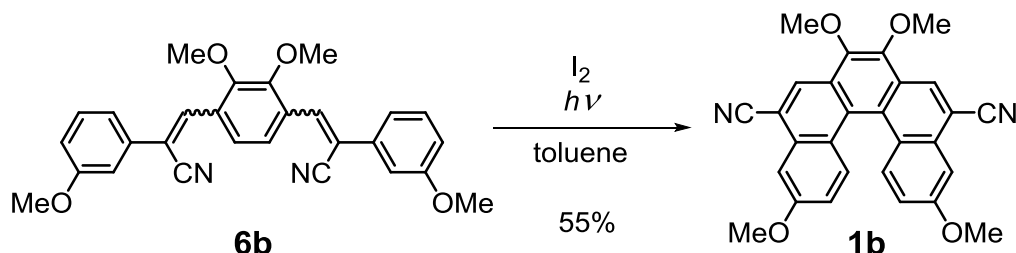

A round-bottom quartz flask was charged with compound **6b** (450 mg, 1.0 mmol), iodine (260 mg, 1.0 mmol) and toluene (25 mL). The solution was stirred and irradiated by mercury lamp (RAYONET) for 15 h. The mixture was washed with aq. Na<sub>2</sub>S<sub>2</sub>O<sub>3</sub> and brine, dried over MgSO<sub>4</sub>, filtered, and concentrated in vacuo. The crude product was purified by silica gel column chromatography (hexane/CH<sub>2</sub>Cl<sub>2</sub> = 25/75) to afford a yellow solid. To remove a structural isomer of **1b** (i.e., 5,10-dicyano-1,7,8,12-tetramethoxy[5]helicene), further purification was conducted by recrystallization from dichloromethane to give compound **1b** as a yellow crystal (250 mg, 0.55 mmol, 55%).

<sup>1</sup>H NMR (CDCl<sub>3</sub>, 500 MHz,  $\delta$ ) 4.04 (6H, s), 4.15 (6H, s), 7.02 (2H, dd,  $J$  = 9.2 Hz, 2.7 Hz), 7.63 (2H, d,  $J$  = 2.4 Hz), 8.17 (2H, d,  $J$  = 9.5 Hz), 8.76 (2H, s); <sup>13</sup>C NMR (CDCl<sub>3</sub>, 126 MHz,  $\delta$ ) 55.6, 61.3, 104.2, 109.9, 118.0, 125.1, 126.0, 127.2, 128.5, 130.4, 131.3, 144.1, 159.2; MALDI-HRMS  $m/z$  [M]<sup>+</sup> calcd for C<sub>28</sub>H<sub>20</sub>N<sub>2</sub>O<sub>4</sub><sup>+</sup>, 448.1418; found, 448.1405.

### 3,7,8,12-tetramethoxy[5]helicene-5,10-dicarboxylic acid (**4b**)

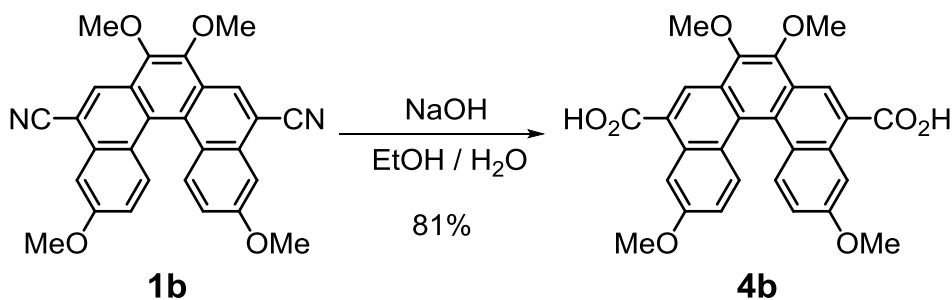

To a suspension of compound **1b** (250 mg, 0.55 mmol) in ethanol (6 mL) was added aq. NaOH (10 M, 6 mL). The mixture was refluxed for 30 h. After cooling to room temperature, the resulting solution was acidified by conc. HCl. The precipitate was filtrated and washed by water to afford compound **4b** as a pale yellow powder (220 mg, 0.45 mmol, 81%).

<sup>1</sup>H NMR (DMSO-*d*<sub>6</sub>, 500 MHz,  $\delta$ ) 3.93 (6H, s), 4.12 (6H, s), 7.05 (2H, dd,  $J = 9.2$  Hz, 2.7 Hz), 8.13 (2H, d,  $J = 9.5$  Hz), 8.42 (2H, d,  $J = 2.7$  Hz), 8.90 (2H, s), 13.44 (2H, s); <sup>13</sup>C NMR (CDCl<sub>3</sub>, 126 MHz,  $\delta$ ) 55.1, 61.2, 105.7, 116.0, 124.6, 125.4, 125.6, 126.2, 127.0, 129.8, 130.4, 144.0, 157.9, 168.3; MALDI-HRMS  $m/z$  [M]<sup>+</sup> calcd for C<sub>28</sub>H<sub>22</sub>O<sub>8</sub><sup>+</sup>: 486.1309; found: 486.1292.

### B. UV-vis., CD, and Fluorescence Spectroscopy

Absorption spectra were measured on a JASCO V-670 spectrophotometer (conditions: scan rate, 200 nm/min; band width, 1 nm) equipped with a ETCS-761 Peltier-type temperature controller. For variable-temperature measurement, heating and cooling rate was set at 5 °C/min and the sample solution was kept for 10 minutes at a target temperature before recording a spectrum. CD spectra were measured on a JASCO J-720WI (conditions: scan rate, 100 nm/min; response, 1 sec; slit width, 1 nm). Fluorescence spectra were measured on a HORIBA SPEX Fluorolog-3 fluorescence spectrophotometer. Fluorescence quantum yields in solution were determined on a Hamamatsu Photonics Absolute quantum yield measurement system C6620-02G. Fluorescence lifetime were recorded on a Hamamatsu Photonics picosecond fluorescence lifetime measurement system C11200 equipped with picosecond light pulser PLP-10, spectrograph C11119-01, and streakscope C10627. Excitation was carried out by a laser diode, whose wavelength was  $\lambda = 378$  nm and pulse width was around 45 ps. Fluorescence emission rate constants ( $k_f$ ) and nonradiative decay rate constants ( $k_{nr}$ ) were calculated from the fluorescence quantum yield ( $\Phi_f$ ) and the area-weighted mean fluorescence lifetime ( $\langle\tau_f\rangle$ ) by using the following equations,

$$\Phi_f = \frac{k_f}{k_f + k_{nr}} = k_f \langle\tau_f\rangle \quad (S1)$$

$$\langle\tau_f\rangle = \frac{1}{k_f + k_{nr}} \quad (S2)$$

For the spectroscopic measurements, a quartz cuvette with 10 mm optical path was used for the sample of compound **2a** (typically,  $c = 1 \times 10^{-5}$  M), and that with 1 mm optical path was used for the sample of compound **3a** and **3b** (typically,  $c = 1 \times 10^{-4}$  M) to avoid distortion of spectrum due to the effect of self-absorption.

### C. TEM measurements

TEM microscopy was conducted on a JEOL JEM-1400 instrument. The acceleration voltage was set at 100 kV. For the sample of compound **2a**, an aqueous solution in water/MeCN (99/1, v/v,  $c = 1 \times 10^{-4}$  M, 2  $\mu$ L) was dropped on a carbon-coated copper grid and dried at room temperature. After being completely dried, the copper grid was exposed to OsO<sub>4</sub> vapor using a Filigen VSC1R1 Vacuum Stain Equipment (pressure of OsO<sub>4</sub> vapor, 500 Pa; stain time, 10 minutes; at room temperature). For the sample of compounds **3a** and **3b**, a heptane solution ( $c = 1 \times 10^{-4}$  M, 5  $\mu$ L) was dropped on a carbon-coated copper grid and dried at room temperature. This drop-and-dry process was repeated for 5 times. After being completely dried, the sample was subjected to TEM measurement without any staining treatment.

### D. DLS measurements

Size distribution of aggregates composed of compound **2a** was measured on a DLS instrument Nicomp 380ZLS particle sizer equipped with a 785 nm red laser as a light source and a peltier-type , using a fixed angle (90°) at room temperature. An appropriate channel width was automatically determined depending on the decay time of observed autocorrelation functions. The Nicomp algorithm was adopted to analyze size distribution from the observed autocorrelation functions.

### E. Theoretical calculations

The geometrical optimization was carried out at the RB3LYP/6-31g(d) level of theory implemented on Gaussian 09 package.<sup>S1</sup> Convergence at a local minimum structure was confirmed by no imaginary frequencies on frequency analysis. Successively the optimized local minimum structures were subjected to time-dependent (TD) DFT calculations to obtain excited states at the same level of theory. Six octyl groups of compounds **3a** and **3b** were replaced by methyl group in order to simplify calculations. Details of vibronic coupling constant (VCC) and vibronic coupling density (VCD) analyses are described in elsewhere.<sup>S2,S3</sup>

## Supporting Data

### Temperature dependent absorption spectra

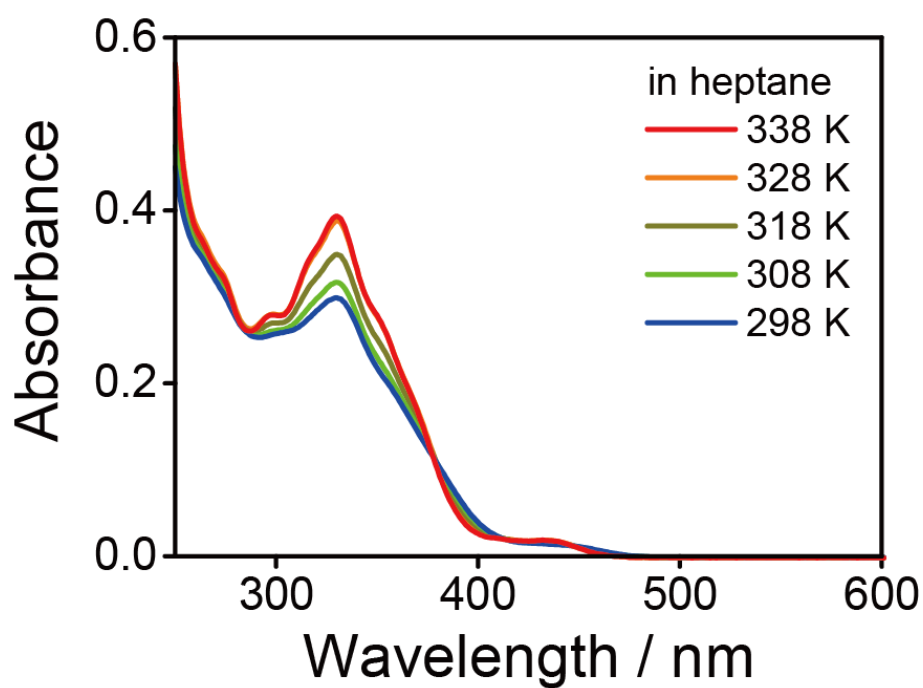

**Figure S1.** Temperature-dependent absorption spectra of compound **3b** in hexane ( $c = 1 \times 10^{-4}$  M). Corresponding spectra of compound **3a** is shown in Fig. 3d in the main text.

## Isolation of enantiomer of compound **2a** by a chiral HPLC

CH. 1 C.S. 2.50 T 3 OFFS 0 07/10/14 16:45

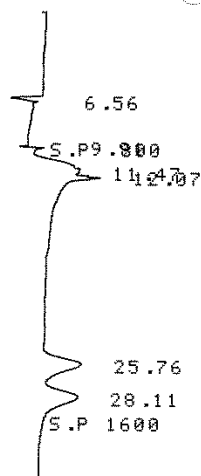

D-2500

07/10/14 16:45

METHOD: TAG: 4 CH: 1

FILE: 0 CALC-METHOD: AREA% TABLE: 0 CONC: AREA

| NO. | RT    | AREA  | CONC   | BC |
|-----|-------|-------|--------|----|
| 1   | 6.56  | 17129 | 12.142 | BB |
| 2   | 9.91  | 3843  | 2.724  | BU |
| 3   | 11.47 | 30451 | 21.586 | VU |
| 4   | 12.07 | 39452 | 27.967 | VB |
| 5   | 25.76 | 23044 | 16.336 | BU |
| 6   | 28.11 | 27148 | 19.245 | VB |

TOTAL

PEAK REJ : 141067 100.000  
0

P. 168

**Figure S2.** (a) Chiral HPLC chart for the racemic **2a**. Conditions: HPLC column, CHIRALPAC IC 250–4.6 mm (5  $\mu$ m); eluent, methanol; flow rate, 0.5 mL/min; detection wavelength, 260 nm;  $R_f$  = 25.8 and 28.1 min for (–)-**2a** and (+)-**2a**, respectively.

### Isolation of enantiomer of compound **3a** by a chiral HPLC

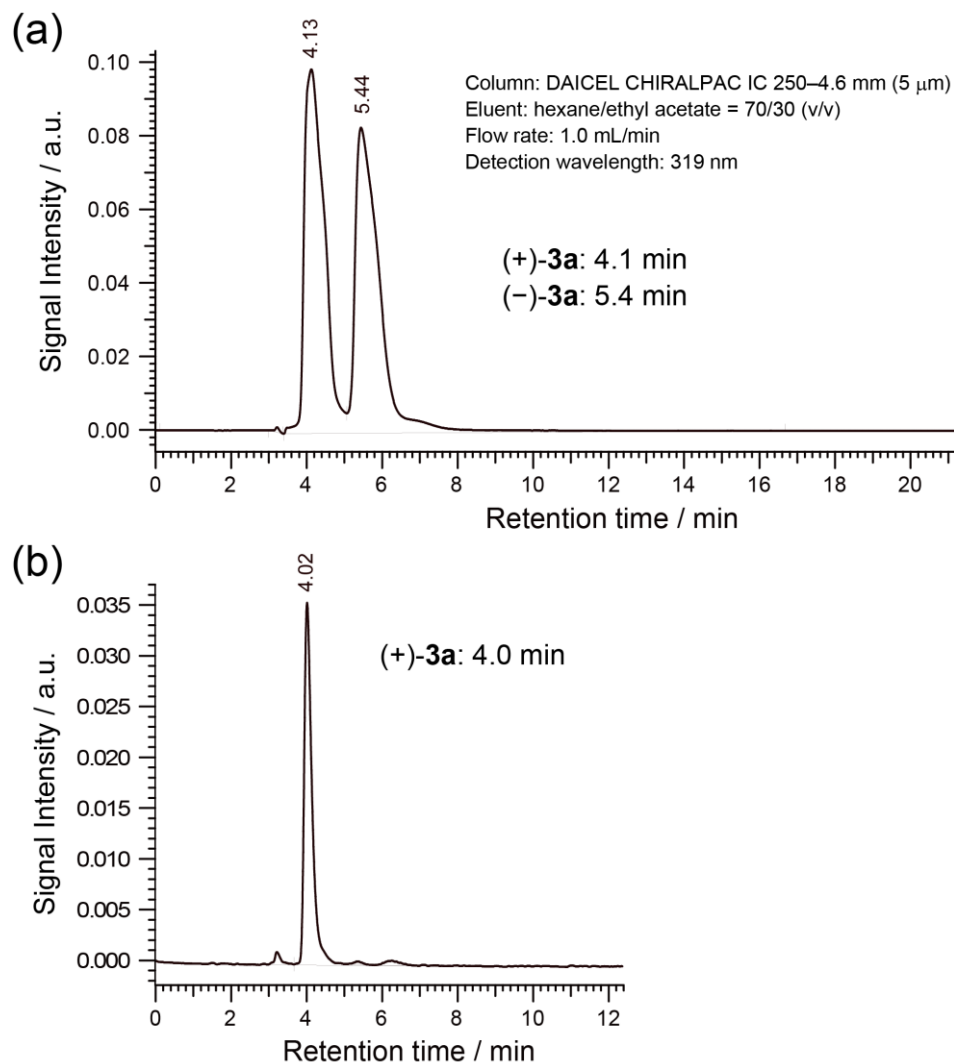

**Figure S3.** (a) Chiral HPLC chart for the racemic **3a**. Conditions: HPLC column, CHIRALPAC IC 250–4.6 mm (5  $\mu$ m); eluent, hexane/ethyl acetate (70/30, v/v); flow rate, 1.0 mL/min; detection wavelength, 319 nm;  $R_f$  = 4.1 and 5.4 min for (+)-**3a** and (–)-**3a**, respectively. (b) The chart for the first fraction, (+)-**3a**, after chiral separation, whose CD spectrum is shown in Fig. S4.

# Calculated and experimental UV-vis and CD spectra

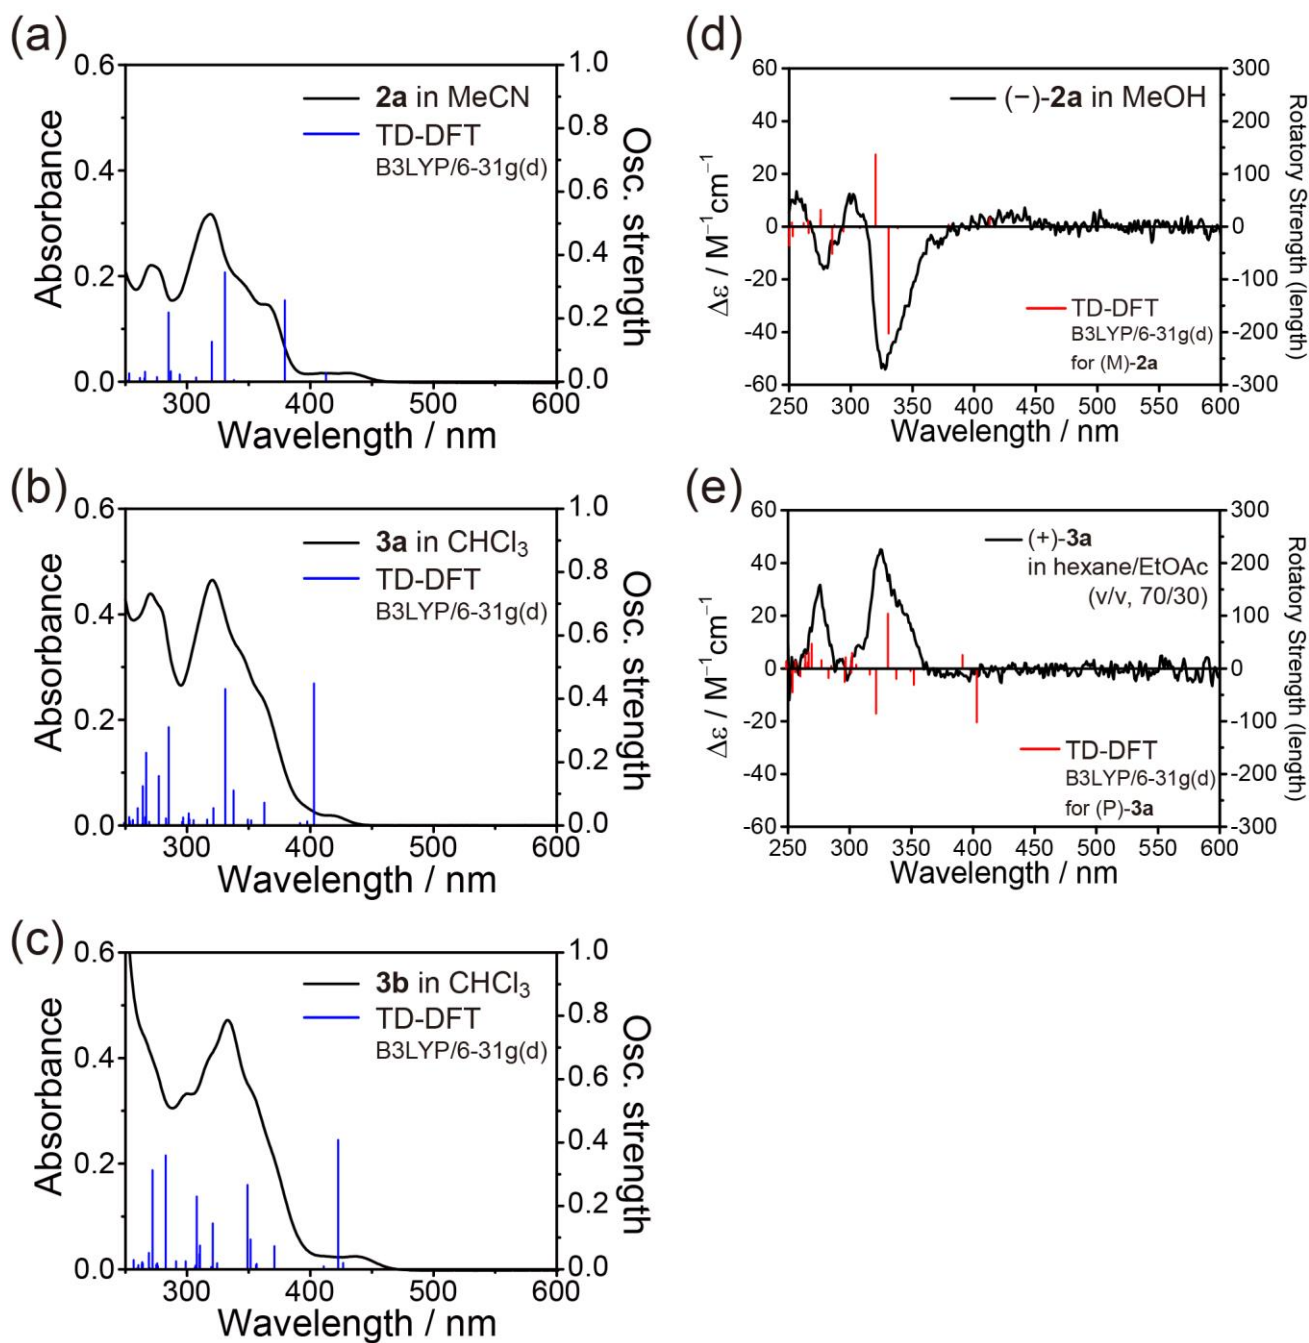

**Figure S4.** Calculated (blue line, at TD-B3LYP/6-31g(d) level, calcd in the gas phase) and experimental UV-vis absorption spectra (black line) of (a) compound **2a** in MeCN, (b) **3a** in CHCl<sub>3</sub>, and (c) **3b** in CHCl<sub>3</sub>. Calculated (red line, at TD-B3LYP/6-31g(d) level, calcd in the gas phase) and experimental CD spectra of (d) compound (-)-**2a** in MeOH and (e) (+)-**3a** in hexane/EtOAc (v/v, 70/30). Based on the comparison of experimental CD spectra with theoretically calculated rotatory strength, helicity of compounds **2a** and **3a** was determined as (M)-(-)-**2a** and (P)-(+)-**3a**, respectively.



## Circular dichroism and rate of helical inversion

Enantiomers of compounds **2a** and **3a** were separated from racemic solution by a chiral HPLC (Figures S2 and S3) and then CD spectra were measured. To avoid any change in enantiomeric excess during removal of solvent, the sample in used eluent was directly used for CD measurement immediately after the chiral separation. For compound **2a**, the first fraction in the chiral HPLC was (–)-**2a**, which exhibits two negative cotton effects at 326 nm ( $\Delta\epsilon = -53 \text{ M}^{-1}\cdot\text{cm}^{-1}$ ) and 279 nm ( $\Delta\epsilon = -16 \text{ M}^{-1}\cdot\text{cm}^{-1}$ ) in methanol (Figure S5a). On the other hand, for compound **3a**, the first fraction was (+)-**3a** and two positive cotton effects were observed at 325 nm ( $\Delta\epsilon = 44 \text{ M}^{-1}\cdot\text{cm}^{-1}$ ) and 275 nm ( $\Delta\epsilon = -30 \text{ M}^{-1}\cdot\text{cm}^{-1}$ ) in mixed solvent of hexane/ethyl acetate (v/v, 70/30) (Figure S5b). The magnitude of CD signal of compounds **2a** and **3a** is roughly one third of parent non-substituted [5]helicene ( $\Delta\epsilon = 154 \text{ M}^{-1}\cdot\text{cm}^{-1}$  at 308 nm).<sup>S4</sup> Based on the comparison of experimental CD spectra with theoretically calculated rotatory strength, helicity of compounds (–)-**2a** and (+)-**3a** was determined as (M)-(–)-**2a** and (P)-(+)-**3a**, respectively (Figure S4).<sup>S5</sup>

In order to investigate the rate of helical inversion of compounds **2a** and **3a**, time-dependent change of CD signal intensity was monitored at 298 K in solution (Figures S5c and d). The decay curve could be fitted well by a mono-exponential function and the rate constant of racemization was determined. The observed half-life of racemization ( $\tau_{1/2,\text{rac}}$ ) at 298 K was 8.5 and 10.3 hours for compounds **2a** and **3a**, respectively. The resulting half-life of racemization is slightly shorter than that of parent non-substituted [5]helicene ( $\tau_{1/2,\text{rac}} = 15$  hours at 298 K and 41 min at 323 K).<sup>S6</sup> Such moderate time scale of racemization of [5]helicenes is advantageous to design a dynamic system utilizing helical inversion, for example, chiroptical property associated with supramolecular system can be switched by external stimuli such as addition of a chiral source.

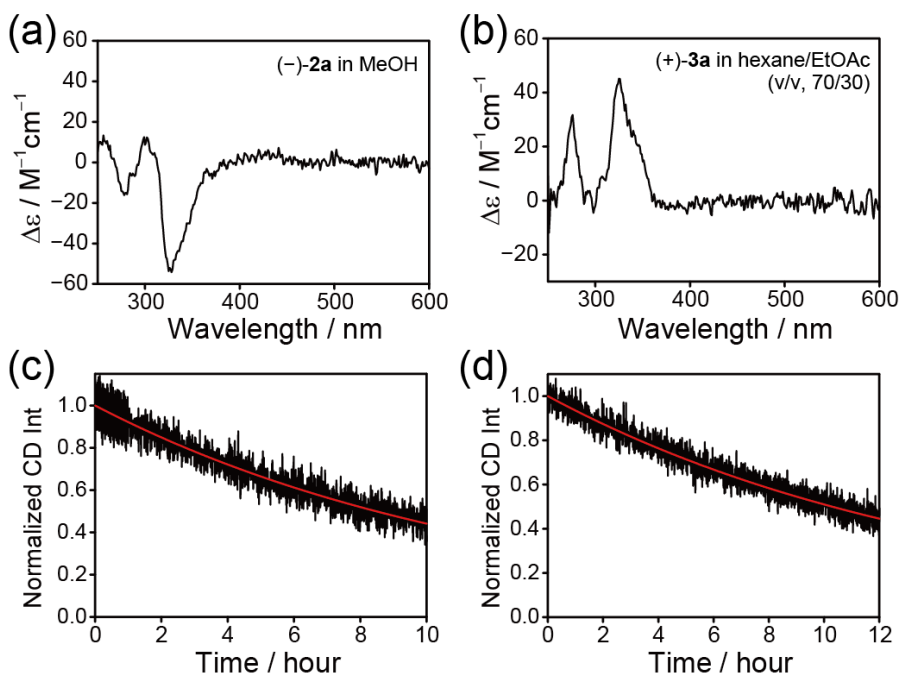

**Figure S5.** CD spectra of (a) (–)-**2a** in methanol ( $c = 5 \times 10^{-6} \text{ M}$ ; at 298 K) and (b) (+)-**3a** in hexane/EtOAc (v/v, 70/30;  $c = 5 \times 10^{-6} \text{ M}$ ; at 298 K) just after chiral separation by a chiral HPLC. Time-dependent decrease of CD intensity of (c) (–)-**2a** in methanol (at 326 nm) and (d) (+)-**3a** in hexane/EtOAc (v/v, 70/30; at 325 nm) at 298 K. Red line denotes the curves of best fit by an exponential function, from which the rate constant of racemization of **2a** and **3a** at 298 K is determined as  $k_{\text{rac}} = 2.3 \times 10^{-5} \text{ s}^{-1}$  and  $1.9 \times 10^{-5} \text{ s}^{-1}$ , respectively.

# TEM images of aggregates composed of compound **2a**

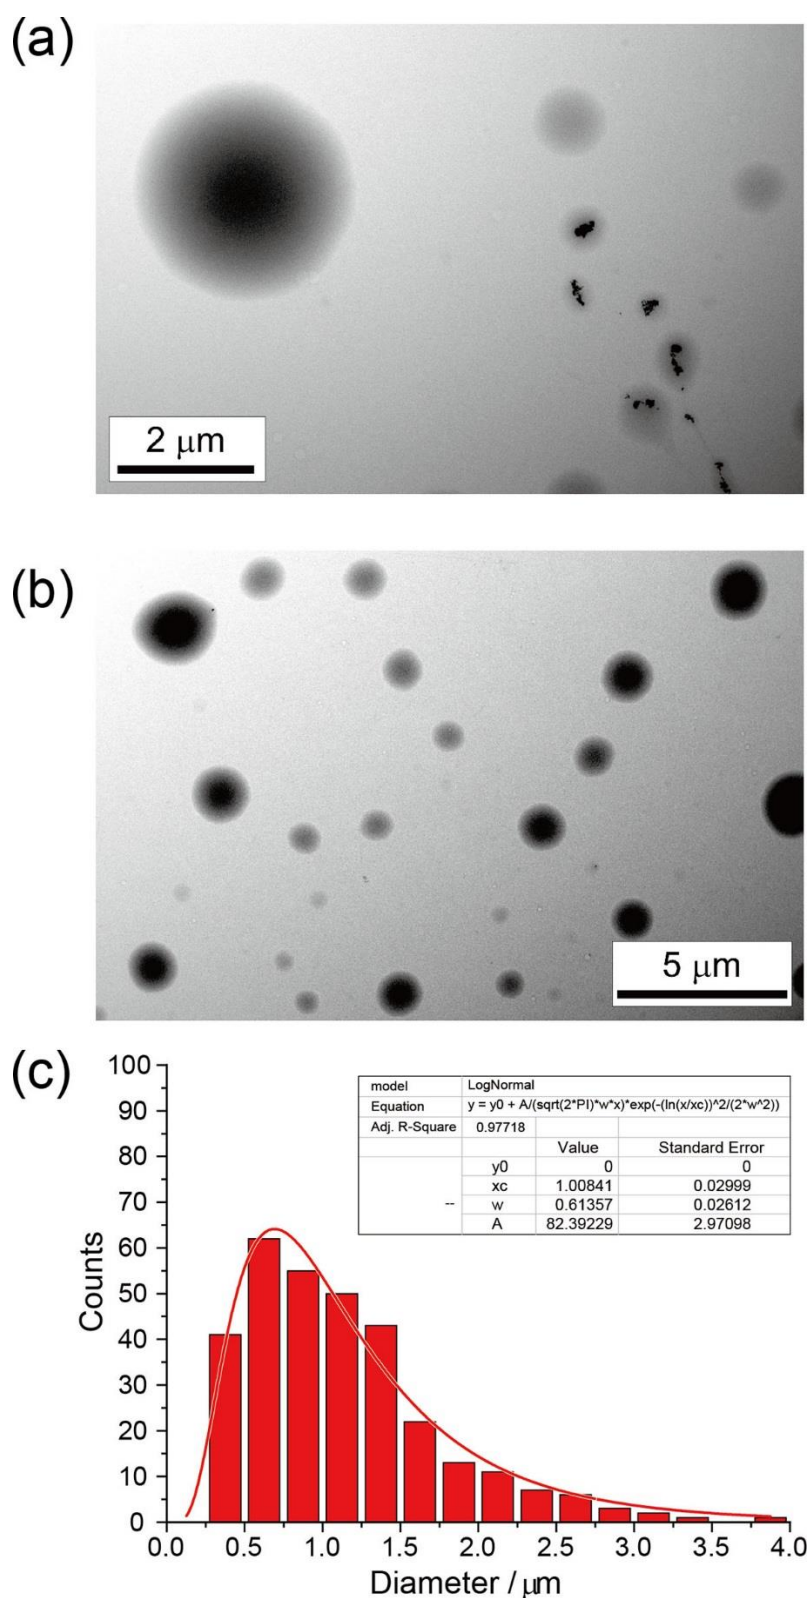

**Figure S6.** (a) TEM images of aggregates of compound **2a** without staining ( $\times 5.0k$ ) and (b) after staining with OsO<sub>4</sub> vapor ( $\times 1.5k$ ). High contrast images of spherical aggregates composed of **2a** could be obtained by staining treatment. (c) Histogram of the diameter of the spherical aggregates (*d*) observed by totally 317 spheres by TEM images. Red line denotes the best-fitting curve by a log-normal distribution ( $d = 1.0 \pm 0.6 \mu m$ ).

Dynamic light scattering (DLS) measurement for an aqueous solution of compound **2a**

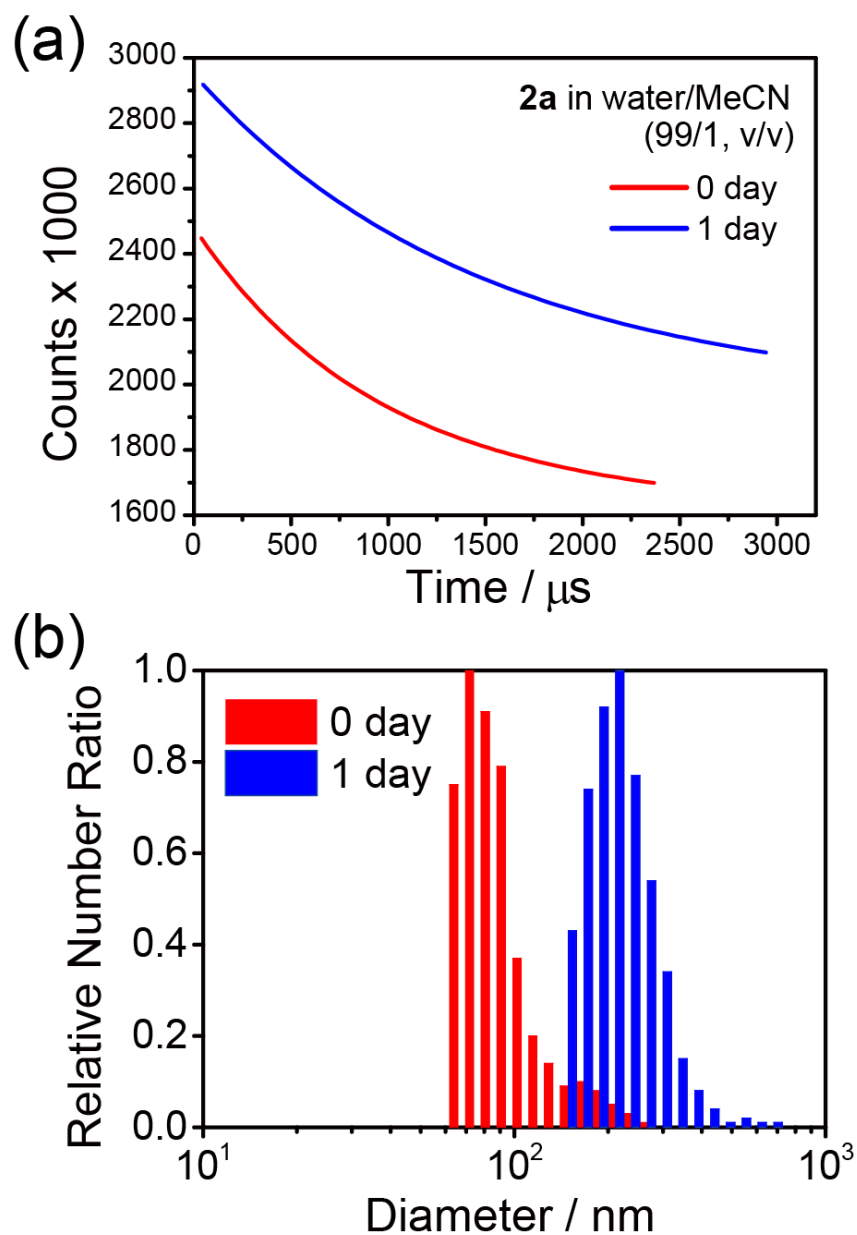

**Figure S7.** (a) Autocorrelation function of compound **2a** in aqueous solution (water/MeCN = 99/1, v/v;  $c = 1 \times 10^{-5}$  M) observed by DLS measurement. Red line denotes the curve observed just after sample preparation (channel width = 37  $\mu$ sec). Blue line denotes that of the sample after 1 day (channel width = 46  $\mu$ sec). (b) Number-weighted size distribution of compound **2a**. Red bar denotes the distribution just after sample preparation ( $d = 80 \pm 20$  nm) and blue bar denotes that after 1 day from sample preparation ( $d = 210 \pm 50$  nm).

TEM images of aggregates composed of compound **3a**

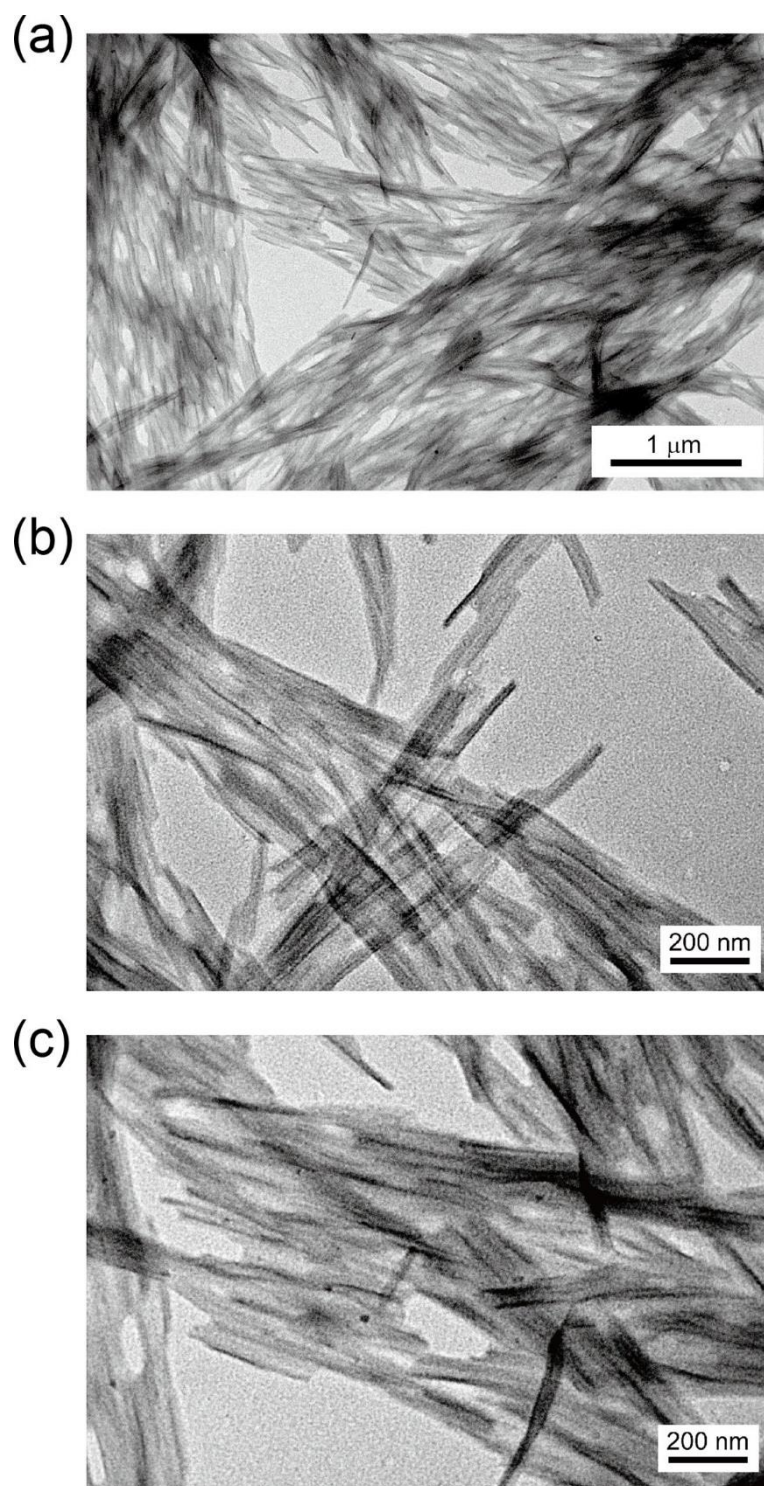

**Figure S8.** TEM images of aggregates of compound **3a** without staining (a,  $\times 10k$ ; b and c,  $\times 30k$ ).



TEM images of aggregates composed of compound **3b**

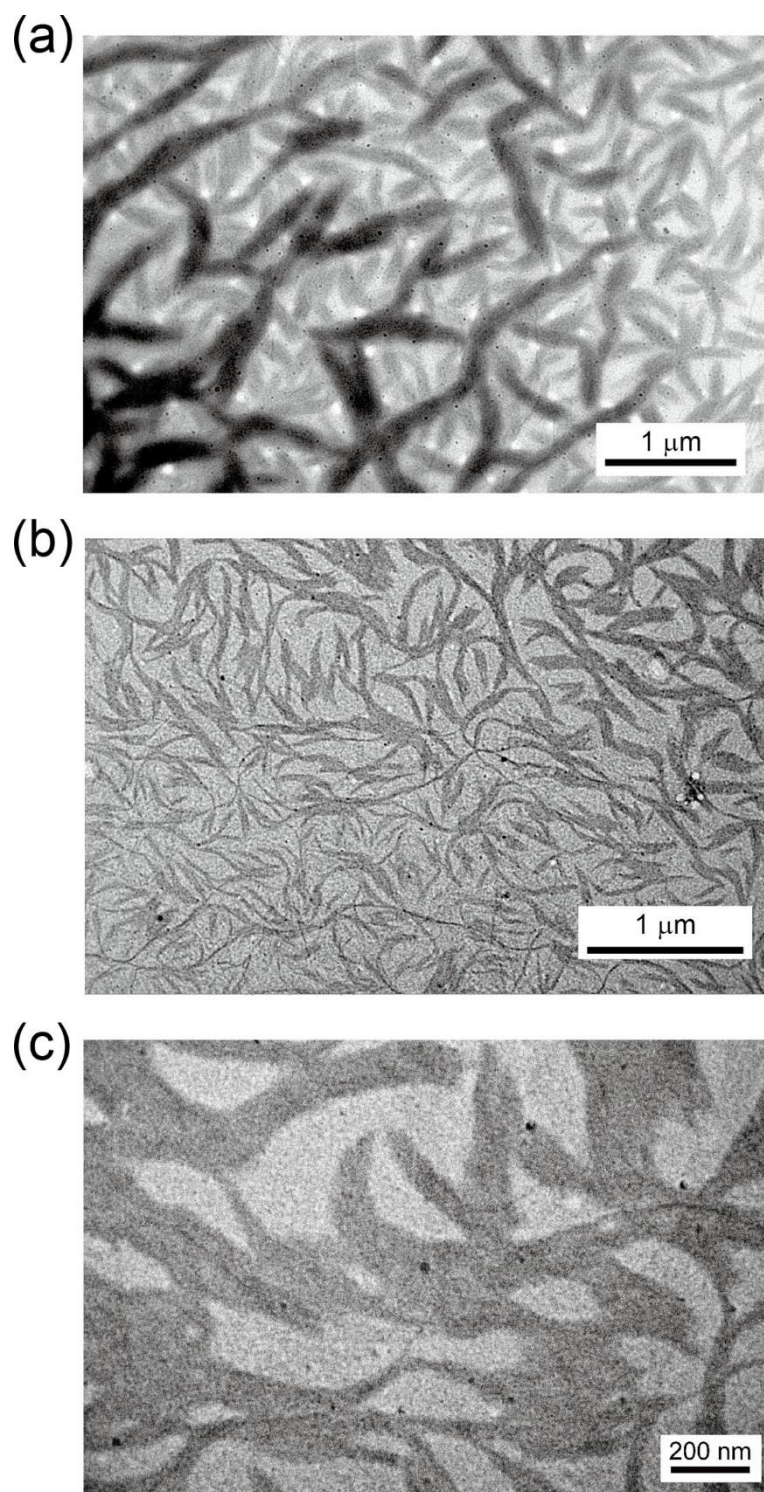

**Figure S9.** TEM images of aggregates of compound **3b** without staining (a,  $\times 10k$ ; b,  $\times 12k$ ; c,  $\times 30k$ ).

The change of fluorescence color upon aggregation on the CIE 1931 diagram

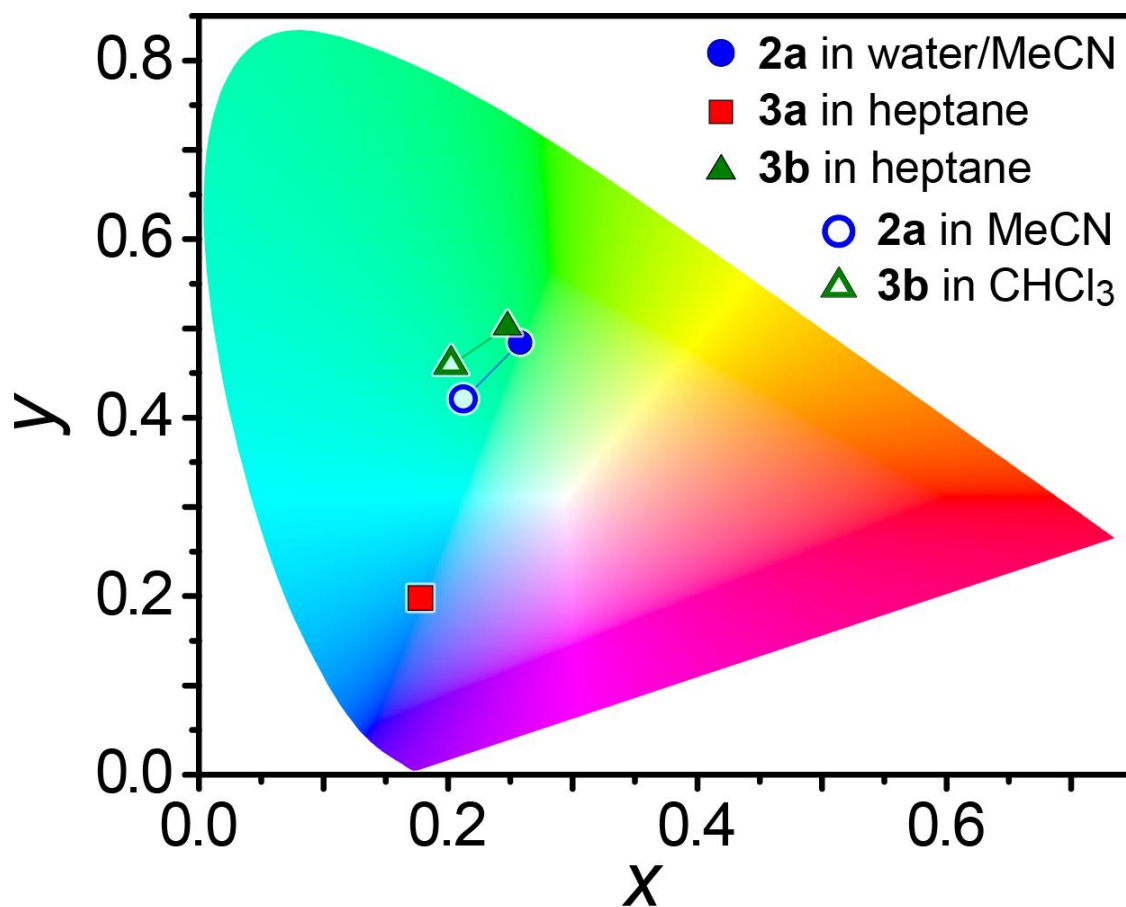

**Figure S10.** Emission color coordinates of compounds **2a** (blue circle), **3a** (red square), and **3b** (green triangle) in the CIE 1931 chromaticity diagram. Open and closed symbol denote the coordinates of monomer state and aggregates, respectively. Compound **3a** is non-fluorescent in the monomer state. The color change upon aggregation is moderate for compounds **2a** and **3b**.

**Table S1. Fluorescence lifetime of compounds 1–3 in solution phase at room temperature <sup>a</sup>**

| compound  | solvent           | $\tau_1$ (ns)  | $\tau_2$ (ns)  | $\tau_3$ (ns)  | $\langle\tau_f\rangle$ (ns) | $\chi^2$       |
|-----------|-------------------|----------------|----------------|----------------|-----------------------------|----------------|
| <b>1a</b> | CHCl <sub>3</sub> | 4.41 (30%)     | 9.16 (70%)     | –              | 7.7                         | 1.12           |
| <b>2a</b> | MeCN              | 7.10 (83%)     | 23.8 (17%)     | –              | 9.9                         | 1.09           |
| <b>2a</b> | water             | 5.30 (76%)     | 32.8 (24%)     | –              | 12.0                        | 1.18           |
| <b>3a</b> | CHCl <sub>3</sub> | – <sup>d</sup> | – <sup>d</sup> | – <sup>d</sup> | – <sup>d</sup>              | – <sup>d</sup> |
| <b>3a</b> | MCH               | 0.32 (65%)     | 1.89 (23%)     | 9.08 (11%)     | 1.7                         | 1.46           |
| <b>3a</b> | heptane           | 3.28 (55%)     | 10.9 (45%)     | –              | 6.7                         | 1.29           |
| <b>3b</b> | CHCl <sub>3</sub> | 0.85 (96%)     | 5.45 (4%)      | –              | 1.0                         | 1.68           |
| <b>3b</b> | MCH               | 1.65 (55%)     | 3.75 (45%)     | –              | 2.6                         | 1.12           |
| <b>3b</b> | heptane           | 3.23 (62%)     | 6.56 (38%)     | –              | 4.5                         | 1.74           |

<sup>a</sup>Fluorescence lifetimes were recorded upon excitation at 378 nm. <sup>b</sup>The area-weighted ratio ( $A_n \cdot \tau_n$ ) are shown in parentheses. <sup>c</sup>The area-weighted mean fluorescence lifetime  $\langle\tau_f\rangle$  was calculated as follows:  $\langle\tau_f\rangle = \Sigma(A_n \cdot \tau_n^2) / \Sigma(A_n \cdot \tau_n)$  where  $A_n$  is the coefficients of the  $n$ -th component. <sup>d</sup>Emission was not detected.



## Time-resolved fluorescence spectra using a streak scope

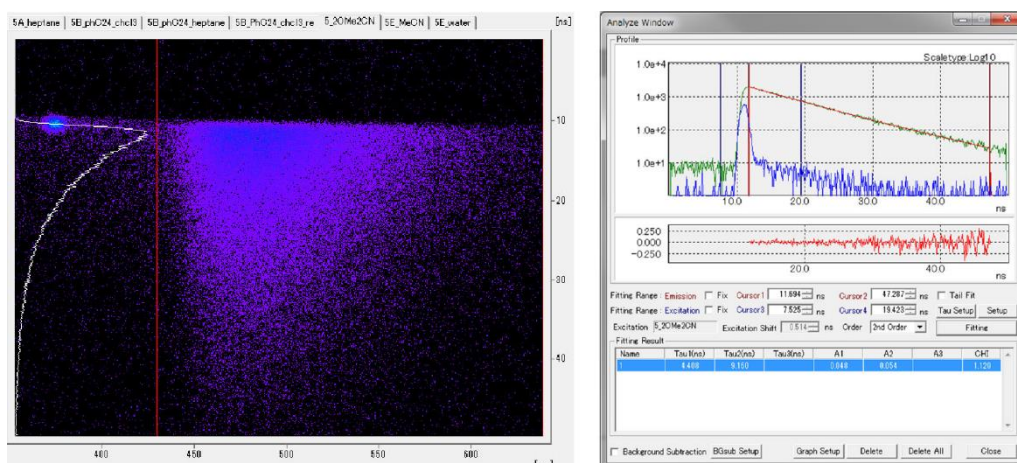

**Figure S11.** Streak image (left) and fluorescence decay analysis (right) of compound **1a** in  $\text{CHCl}_3$ .

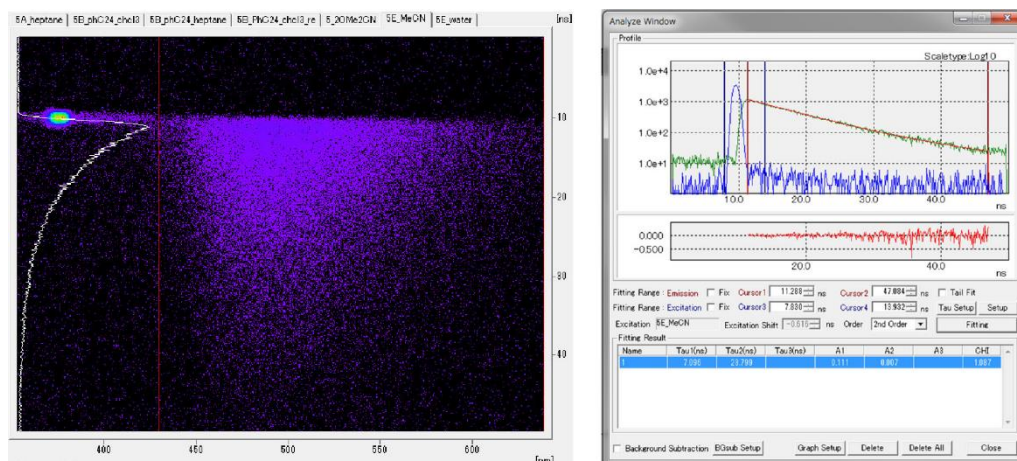

**Figure S12.** Streak image (left) and fluorescence decay analysis (right) of compound **2a** in  $\text{MeCN}$  ( $c = 1.0 \times 10^{-5} \text{ M}$ ).

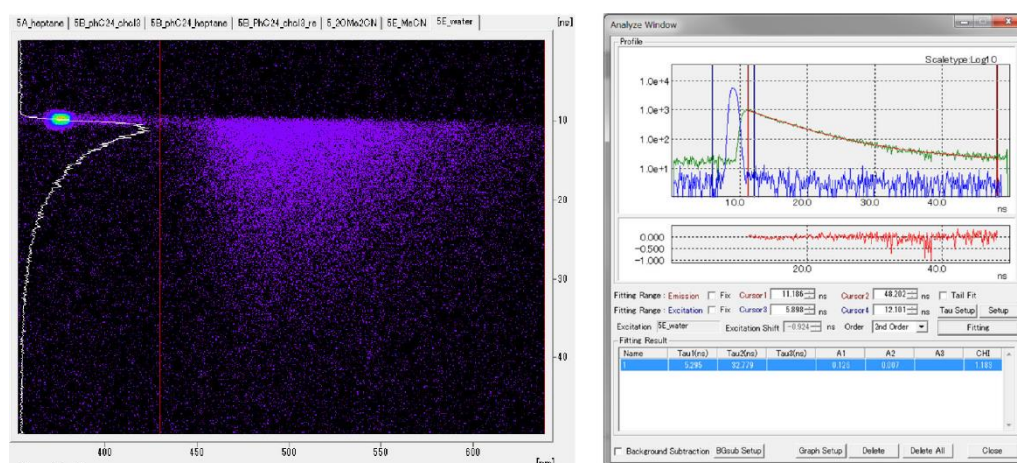

**Figure S13.** Streak image (left) and fluorescence decay analysis (right) of compound **2a** in aqueous media (water/ $\text{MeCN} = 99/1$ , v/v;  $c = 1.0 \times 10^{-5} \text{ M}$ ).



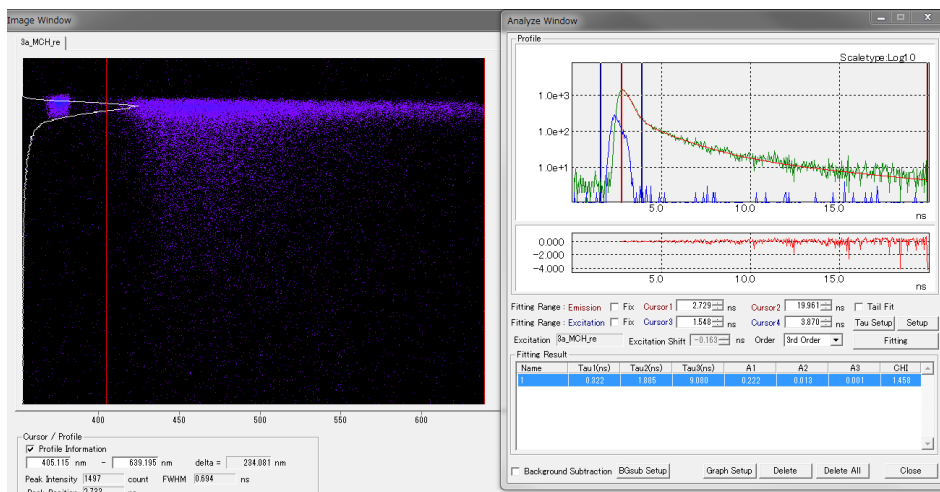

**Figure S14.** Streak image (left) and fluorescence decay analysis (right) of compound **3a** in MCH ( $c = 1 \times 10^{-4}$  M).

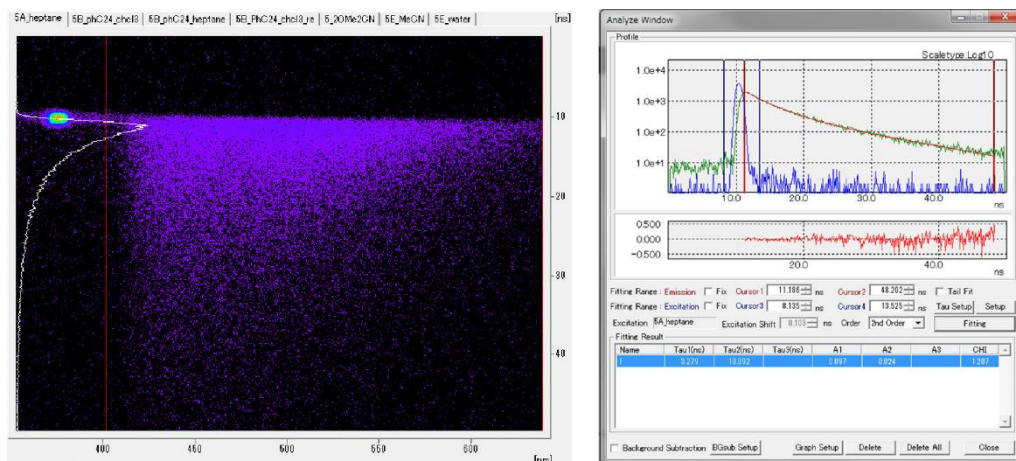

**Figure S15.** Streak image (left) and fluorescence decay analysis (right) of compound **3a** in heptane ( $c = 1.0 \times 10^{-4}$  M).

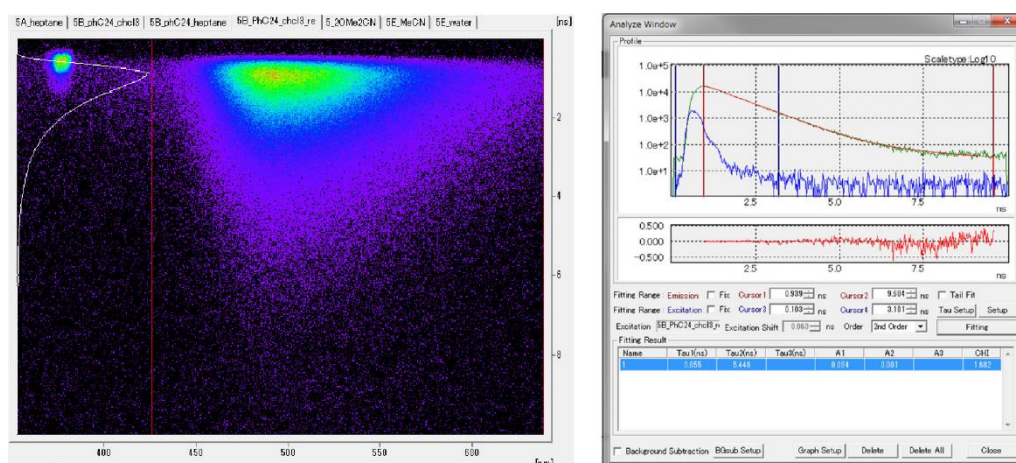

**Figure S16.** Streak image (left) and fluorescence decay analysis (right) of compound **3b** in  $\text{CHCl}_3$  ( $c = 1.0 \times 10^{-4}$  M).

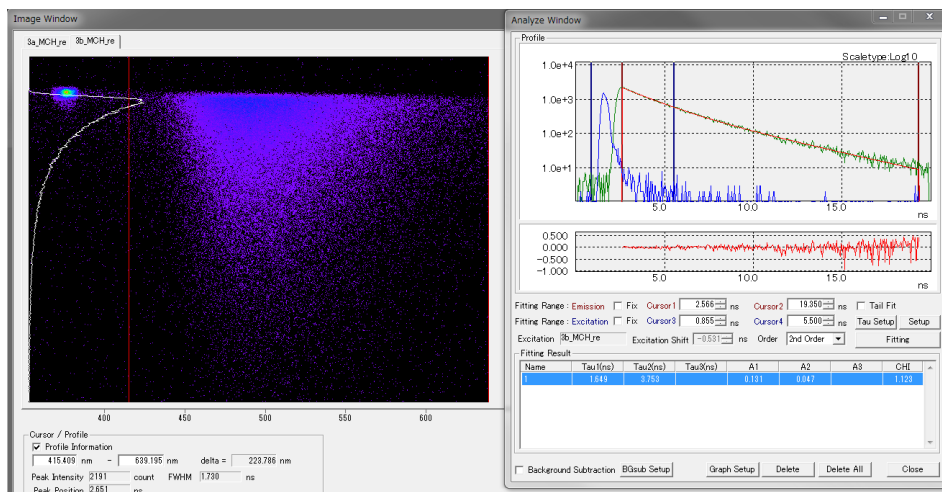

**Figure S17.** Streak image (left) and fluorescence decay analysis (right) of compound **3b** in MCH ( $c = 1 \times 10^{-4}$  M).

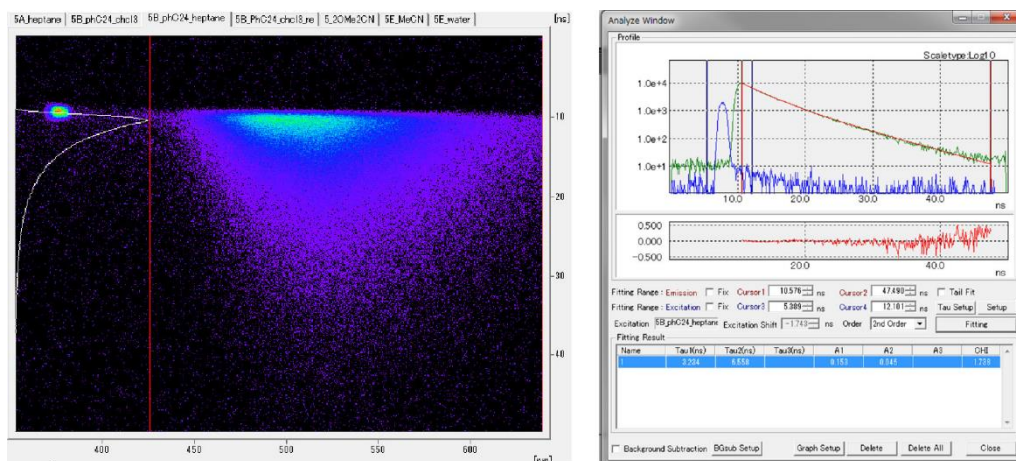

**Figure S18.** Streak image (left) and fluorescence decay analysis (right) of compound **3b** in heptane ( $c = 1.0 \times 10^{-4}$  M).

## Excited states of compounds 3a and 3b

**Table S2. Excited states of 3a calculated at the TD-B3LYP/6-31g(d) level of theory**

| State <sup>a</sup>             | Excitation energy |        | Oscillator strength | Major configurations (coefficeit) |        |            |
|--------------------------------|-------------------|--------|---------------------|-----------------------------------|--------|------------|
|                                | /eV               | / nm   |                     |                                   |        |            |
| S <sub>1</sub> @S <sub>0</sub> | 3.0766            | 402.98 | 0.4483              | HO                                | → LU   | (0.69688)  |
| S <sub>2</sub> @S <sub>0</sub> | 3.1189            | 397.52 | 0.0133              | HO-2                              | → LU   | (0.60907)  |
| S <sub>3</sub> @S <sub>0</sub> | 3.1660            | 391.61 | 0.0083              | HO-1                              | → LU   | (0.70291)  |
| S <sub>1</sub> @S <sub>1</sub> | 1.6944            | 731.75 | 0.1276              | HO                                | → LU   | (0.70568)  |
| S <sub>2</sub> @S <sub>1</sub> | 2.4997            | 496.00 | 0.0118              | HO                                | → LU+1 | (0.70290)  |
| S <sub>3</sub> @S <sub>1</sub> | 2.6823            | 462.23 | 0.2824              | HO-1                              | → LU   | (0.70308)  |
| S <sub>1</sub> @S <sub>2</sub> | 2.2068            | 561.83 | 0.2042              | HO                                | → LU   | (0.69372)  |
| S <sub>2</sub> @S <sub>2</sub> | 2.2519            | 550.59 | 0.0023              | HO                                | → LU+1 | (-0.69346) |
| S <sub>3</sub> @S <sub>2</sub> | 3.0044            | 412.67 | 0.0094              | HO-2                              | → LU   | (-0.56028) |

<sup>a</sup>S<sub>m</sub>@S<sub>n</sub> denotes S<sub>m</sub> state calculated using the optimized geometry of S<sub>n</sub>.

**Table S3. Excited states of 3b calculated at the TD-B3LYP/6-31g(d) level of theory**

| State <sup>a</sup>             | Excitation energy |         | Oscillator strength | Major configurations (coefficeit) |        |            |
|--------------------------------|-------------------|---------|---------------------|-----------------------------------|--------|------------|
|                                | /eV               | / nm    |                     |                                   |        |            |
| S <sub>1</sub> @S <sub>0</sub> | 2.9058            | 426.68  | 0.0204              | HO-2                              | → LU   | (0.62738)  |
| S <sub>2</sub> @S <sub>0</sub> | 2.9343            | 422.54  | 0.4082              | HO                                | → LU   | (0.70027)  |
| S <sub>3</sub> @S <sub>0</sub> | 3.0178            | 410.84  | 0.0100              | HO-1                              | → LU   | (0.66139)  |
| S <sub>1</sub> @S <sub>1</sub> | 2.5223            | 491.55  | 0.0291              | HO-1                              | → LU   | (0.60625)  |
|                                |                   |         |                     | HO-2                              | → LU   | (0.32309)  |
| S <sub>2</sub> @S <sub>1</sub> | 2.6655            | 465.15  | 0.4747              | HO                                | → LU   | (0.70238)  |
| S <sub>3</sub> @S <sub>1</sub> | 2.7602            | 449.18  | 0.0125              | HO-2                              | → LU   | (0.61568)  |
|                                |                   |         |                     | HO-1                              | → LU   | (-0.34001) |
| S <sub>1</sub> @S <sub>2</sub> | 1.1953            | 1037.27 | 0.0366              | HO                                | → LU   | (0.70481)  |
| S <sub>2</sub> @S <sub>2</sub> | 2.2326            | 555.35  | 0.0060              | HO                                | → LU+1 | (-0.70459) |
| S <sub>3</sub> @S <sub>2</sub> | 2.4638            | 503.22  | 0.2124              | HO-1                              | → LU   | (-0.69327) |

<sup>a</sup>S<sub>m</sub>@S<sub>n</sub> denotes S<sub>m</sub> state calculated using the optimized geometry of S<sub>n</sub>.

Structural relaxation in the lowest energy excited state ( $S_1$ )

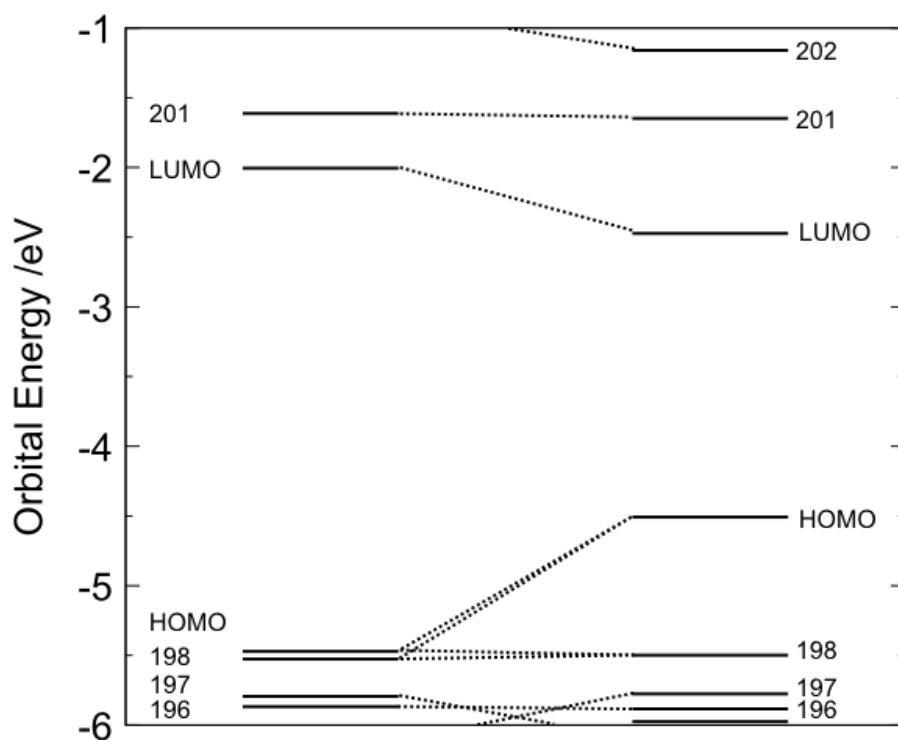

**Figure S19.** Level shifts of Kohn-Sham frontier orbitals upon the vibrational relaxation of **3a** in the  $S_1$  state (before, left; after, right)

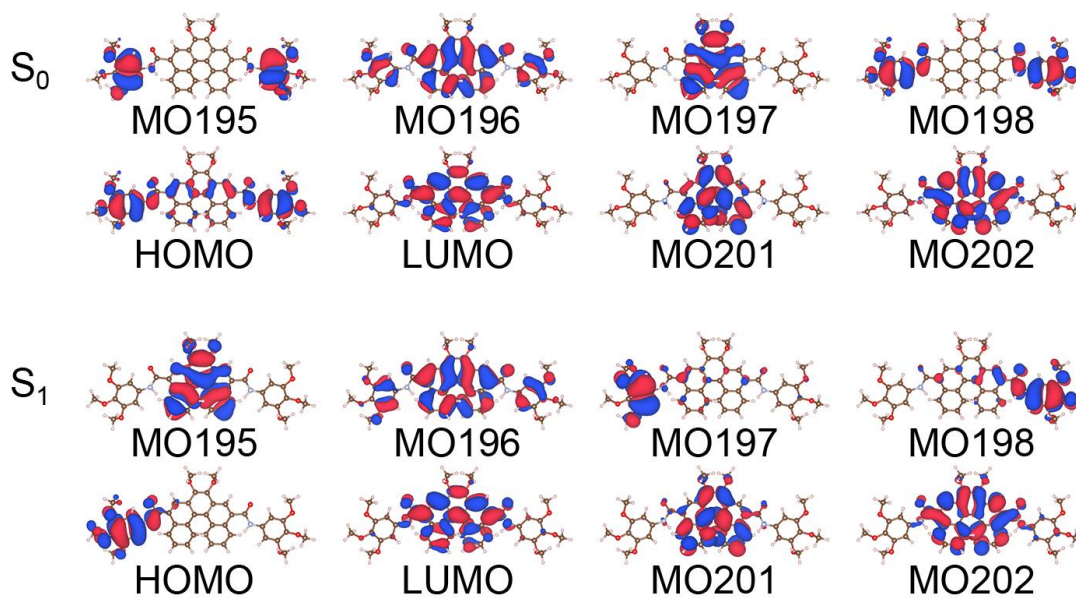

**Figure S20.** Kohn-Sham orbitals of **3a** in the ground ( $S_0$ ) and excited ( $S_1$ ) states.



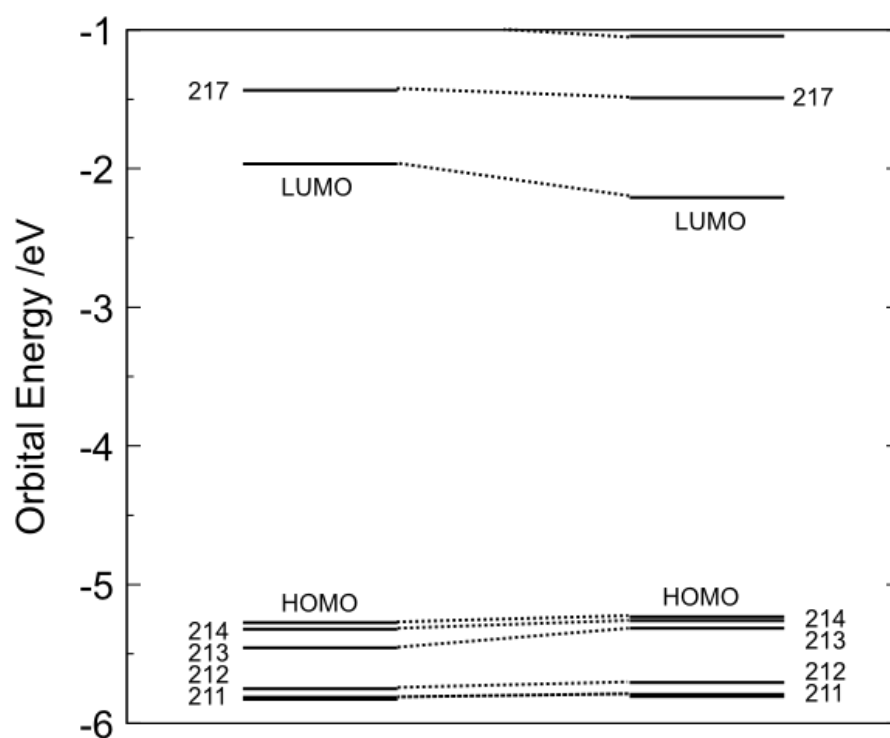

**Figure S21.** Level shifts of Kohn-Sham frontier orbitals upon the vibrational relaxation of **3b** in the  $S_1$  state (before, left; after, right)

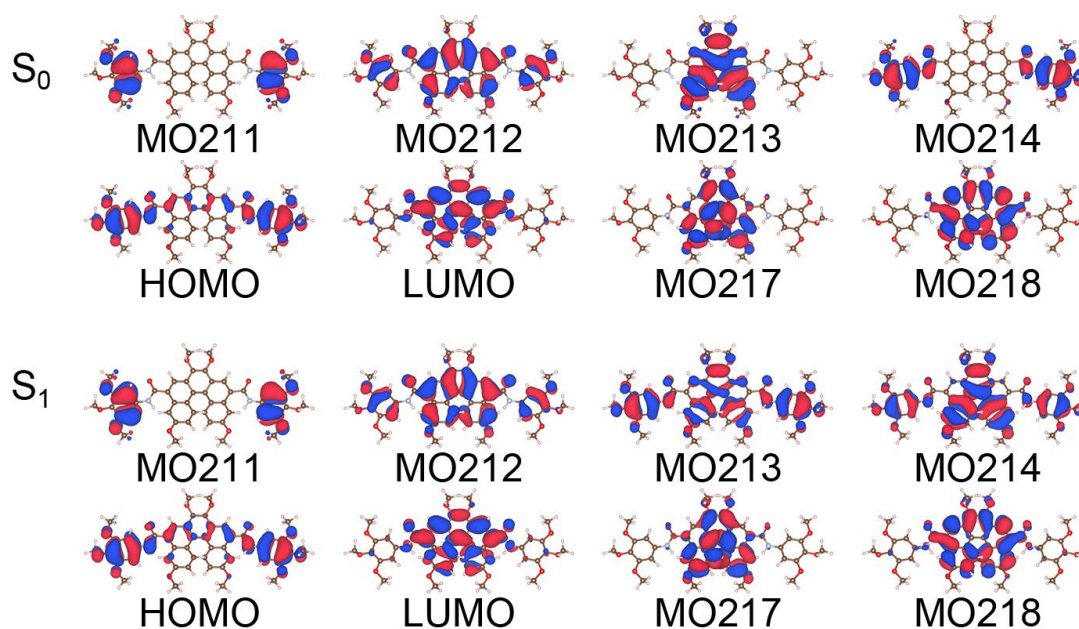

**Figure S22.** Kohn-Sham orbitals of **3b** in the ground ( $S_0$ ) and excited ( $S_1$ ) states.

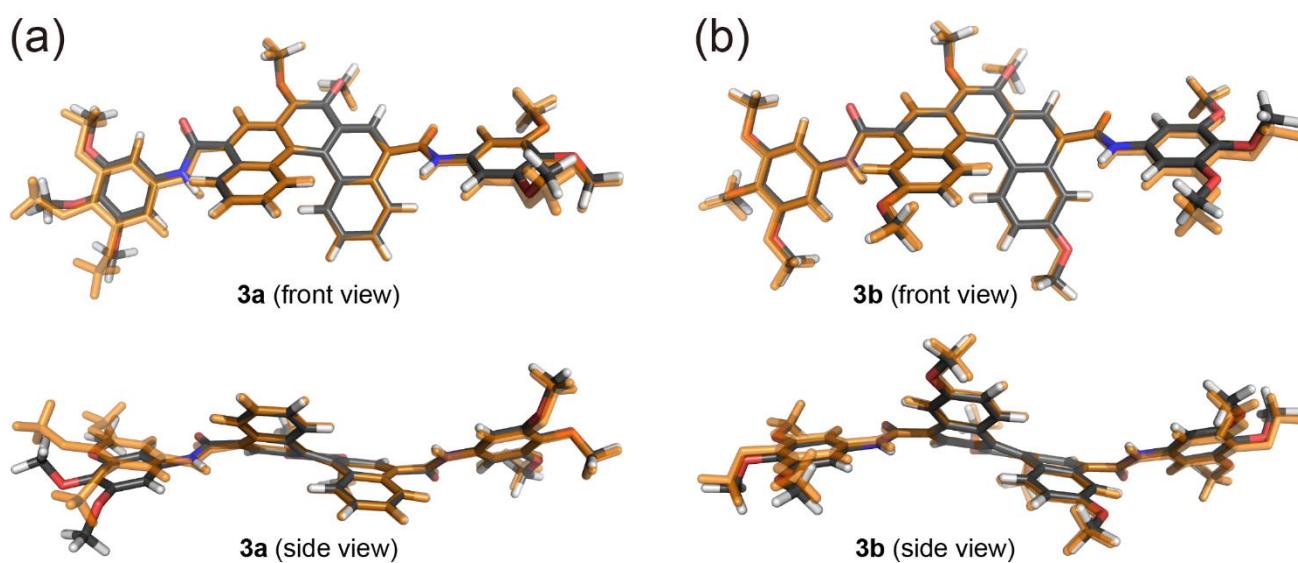

**Figure S23.** Superposition of optimized geometries of (a) **3a** and (b) **3b** in the ground state ( $S_0$ ) and in the lowest energy excited state ( $S_1$ ) calculated at the TD-B3LYP/6-31g(d) level of theory. The optimized structure in the  $S_1$  state is colored by orange. Because of the CT-type transition of compound **3a**, vibrational relaxation of **3a** (that is prominent in the left (3,4,5-trialkoxyphenyl)carbamoyl moiety) is larger than that of **3b**.

## The result of diagonal vibronic coupling density (VCD) analysis

**Table S4. Vibrational modes with large vibronic coupling (more than  $1 \times 10^{-4}$ )**

| Compound  | Mode# | Frequency / $\text{cm}^{-1}$ | VCC / a.u.   | Dim. Less VCC | Stabilization energy / eV |
|-----------|-------|------------------------------|--------------|---------------|---------------------------|
| <b>3a</b> | 191   | 1389.733                     | 0.0002150914 | 0.4268768830  | 0.0156990306              |
|           | 230   | 1577.764                     | 0.0002797862 | 0.4590285531  | 0.0206090397              |
|           | 232   | 1625.989                     | 0.0003424703 | 0.5370602729  | 0.0290736723              |
| <b>3b</b> | 203   | 1387.674                     | 0.0003829236 | 0.7616532026  | 0.0499043468              |
|           | 253   | 1644.536                     | 0.0002481866 | 0.3826394367  | 0.0149265383              |

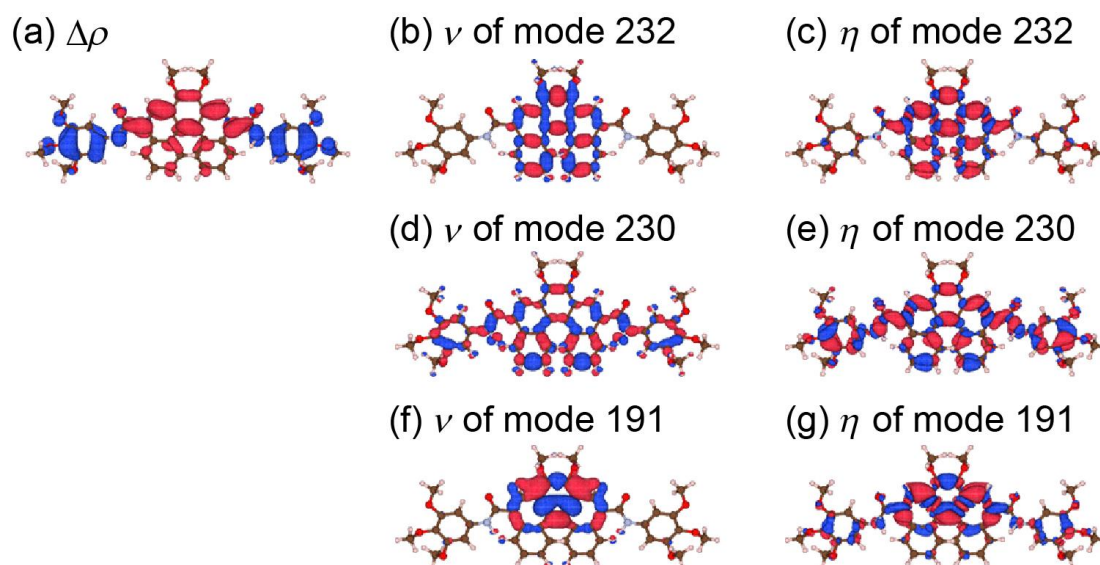

**Figure S24.** Diagonal vibronic coupling density (VCD) analysis for the  $S_1$  Franck-Condon state of **3a**. (a) Electron density difference between  $S_1$  and  $S_0$  ( $\Delta\rho$ ) (b,d,f) potential derivative ( $\nu$ ) of mode 232, 230, and 191, and (c,e,g) diagonal VCD ( $\eta$ ) of mode 232, 230, and 191. The isosurface values are 0.01 a.u. for  $\Delta\rho$ , 0.003 a.u. for  $\nu$ , and  $1.0 \times 10^{-6}$  a.u. for  $\eta$ .

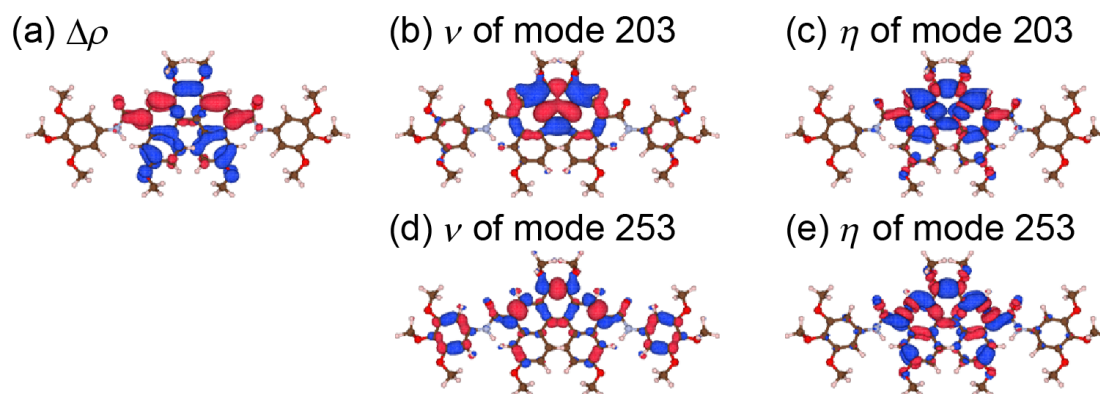

**Figure S25.** Diagonal vibronic coupling density (VCD) analysis for the  $S_1$  Franck-Condon state of **3b**. (a) Electron density difference between  $S_1$  and  $S_0$  ( $\Delta\rho$ ) (b,d) potential derivative ( $\nu$ ) of mode 203 and 253, (c,e) diagonal VCD ( $\eta$ ) of mode 203 and 253. The isosurface values are 0.01 a.u. for  $\Delta\rho$ , 0.003 a.u. for  $\nu$ , and  $1.0 \times 10^{-6}$  a.u. for  $\eta$ .

## The result of off-diagonal vibronic coupling density (VCD) analysis

Off-diagonal vibronic coupling constant (VCC) of compound **3b** is larger than that of **3a**, which is associated with the local excitation (LE) property in the  $S_1$  state of **3b**. When the  $S_0$ - $S_1$  transition is localized in a part of molecule, overlap density between  $S_1$  and  $S_0$  states ( $\rho_0$ ) becomes large. A large  $\rho_0$  gives rise to a large off-diagonal VCC, therefore, non-radiative decay constant ( $k_{nr}$ ) tends to be large. The observed large off-diagonal VCC values for compound **3b** is consistent with the experimentally determined  $k_{nr}$  value in the monomer state ( $k_{nr} = 0.94 \text{ ns}^{-1}$ ).

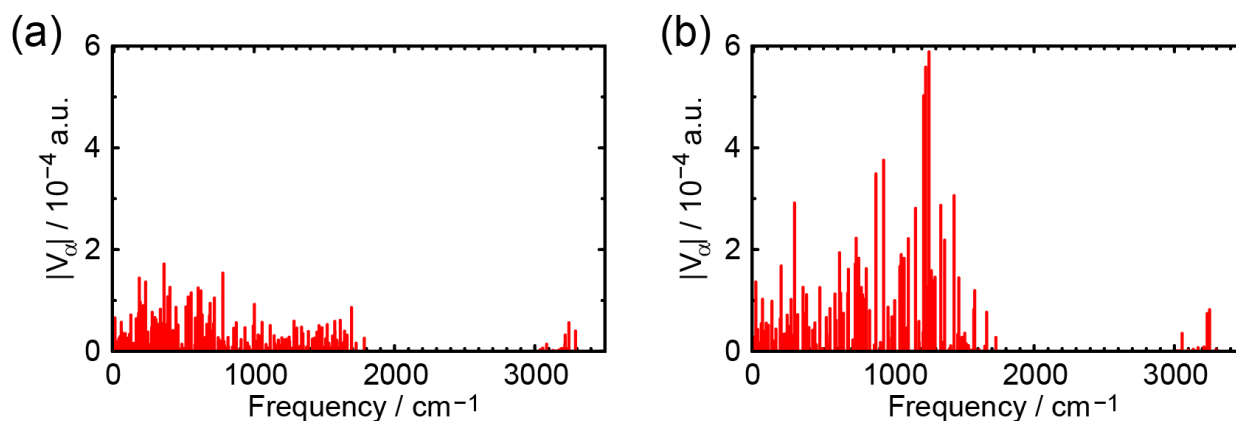

**Figure S26.** Off-diagonal vibronic coupling constant (VCC) for the normal modes of (a) **3a** and (b) **3b**.

**Table S5. Vibrational modes with large VCC between  $S_1$  and  $S_0$  states**

| Compound  | Mode# | Frequency / $\text{cm}^{-1}$ | VCC / $10^{-4}$ a.u. |
|-----------|-------|------------------------------|----------------------|
| <b>3a</b> | 61    | 357.7601                     | 1.7187015            |
|           | 106   | 776.0229                     | 1.5383858            |
|           | 36    | 181.4421                     | 1.4413278            |
| <b>3b</b> | 186   | 1251.112                     | 5.8833112            |
|           | 182   | 1227.696                     | 5.5838244            |
|           | 175   | 1212.957                     | 5.0215513            |



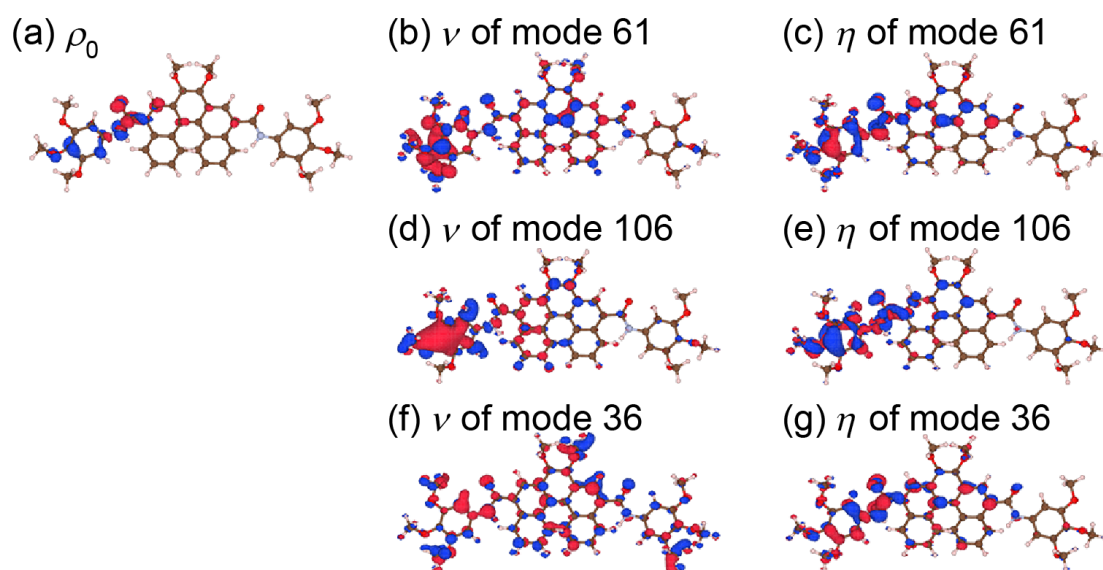

**Figure S27.** Off-diagonal vibronic coupling density (VCD) analysis for the  $S_1$  adiabatic state and  $S_0$  state of **3a**. (a) Overlap density between  $S_1$  and  $S_0$  ( $\rho_0$ ), (b,d,f) potential derivative ( $\nu$ ) of modes 61, 106, and 253, (c,e,g) off-diagonal VCD ( $\eta$ ) of modes 61, 106, and 36. The isosurface values are 0.01 a.u. for  $\rho_0$ , 0.003 a.u. for  $\nu$ , and  $1.0 \times 10^{-6}$  a.u. for  $\eta$ .

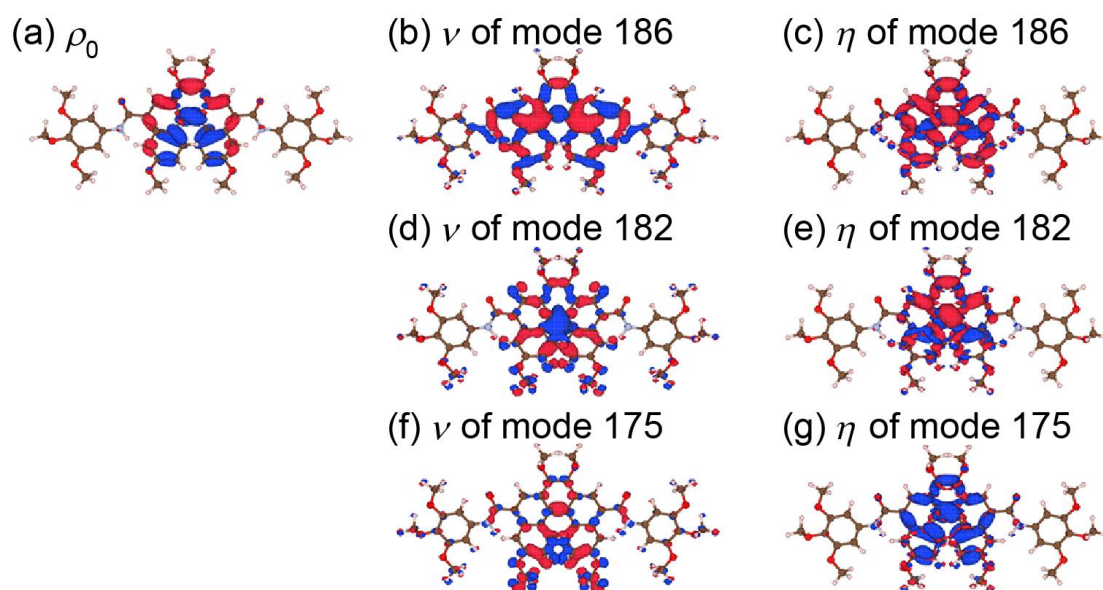

**Figure S28.** Off-diagonal vibronic coupling density (VCD) analysis for the  $S_1$  adiabatic state and  $S_0$  state of **3b**. (a) Overlap density between  $S_1$  and  $S_0$  ( $\rho_0$ ), (b,d,f) potential derivative ( $\nu$ ) of modes 186, 182, and 175, (c,e,g) off-diagonal VCD ( $\eta$ ) of modes 186, 182, and 175. The isosurface values are 0.01 a.u. for  $\rho_0$ , 0.003 a.u. for  $\nu$ , and  $1.0 \times 10^{-6}$  a.u. for  $\eta$ .

## Fragment molecular orbital (FMO) analysis

To elucidate the origin of the CT excitation in **3a**, we performed the fragment molecular orbital (FMO) analyses of **3a** and **3b**. The orbital interactions in **3a** and **3b** are depicted in Figs. S26.

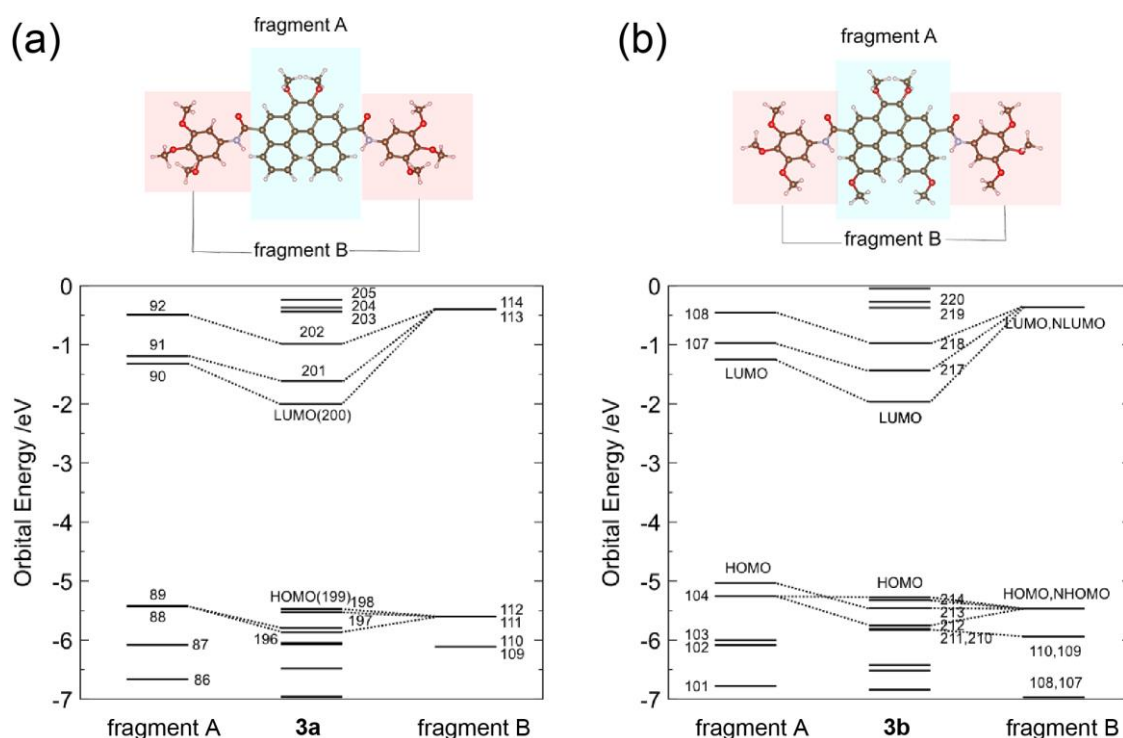

**Figure S29.** Orbital interactions in (a) compound **3a** and (b) **3b**. Left, orbital correlation diagram of fragment A; center, whole molecule; right, fragment B. The terminal of each fragment was replaced by hydrogen atom for the calculation of fragments. The fragments were calculated at B3LYP/6-31g(d) level of theory.

In the case of compound **3a**, the FMO levels of fragment A (i.e., MO89 and MO88) locate close to those of fragment B (i.e., MO112 and MO111) in **3a**. The resulting MOs of **3a**—that is localized in fragment A—are HOMO–2 and HOMO–3 (i.e., MO196 and MO197). Since the two fragments strongly interact, MO196 and MO197 are stabilized away from the frontier level (MO199). Accordingly, the frontier HOMO and HOMO–1 is of fragment B. On the other hand, the LUMO is greatly delocalized on fragment A.

The  $S_1$  state of **3a** is a HOMO-LUMO excitation, while that of **3b** is a (HOMO–2)-LUMO excitation. The HOMO and HOMO–2 of **3b** (MO215 and MO213) are nearly degenerate. On the other hand, the HOMO and HOMO–2 in **3a** (MO199 and MO197) is separated, because of the strong orbital interaction in the HOMO–2 between the occupied frontier orbitals of fragments A and B. Therefore, the  $S_1$  excitation of **3a** is the HOMO-LUMO excitation of the CT type from fragment B to fragment A.

As shown in Fig. S26, the levels of the HOMO and HOMO–1 of [5]helicene core (fragment A) in **3b** are separated because of the methoxy group. The HOMO level of fragment A is slightly higher than that of fragment B. As is the same in **3a**, the HOMO of fragment A in **3b** is stabilized because of the orbital interaction with the HOMO of fragment B. It should be noted that the resulting HOMO–2 of **3b** is close to the HOMO and HOMO–1 of **3b**, since the stabilization due to the orbital interaction between fragment A and fragment B compensates the level shift of the fragment A HOMO due to the methoxy substitution.

### <sup>1</sup>H and <sup>13</sup>C NMR spectra

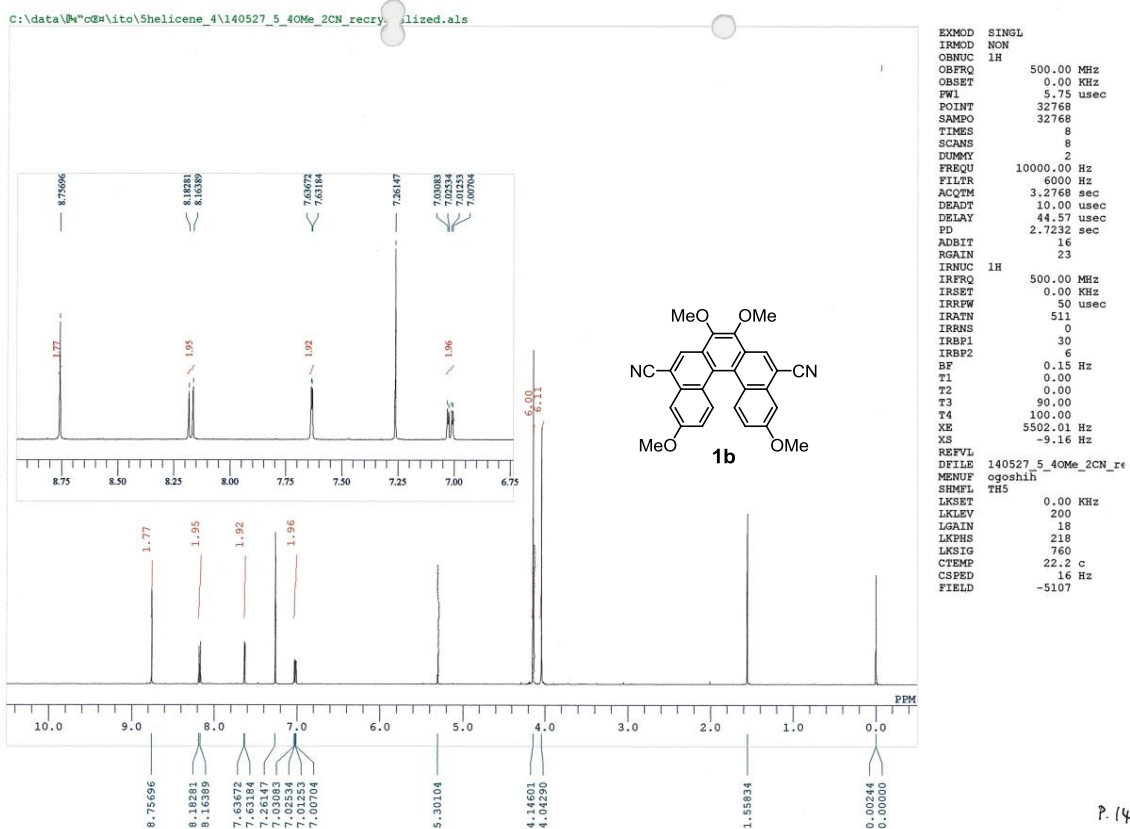

**Figure S30.**  $^1\text{H}$  NMR spectra of compound **1b** ( $\text{CDCl}_3$ , 500 MHz)

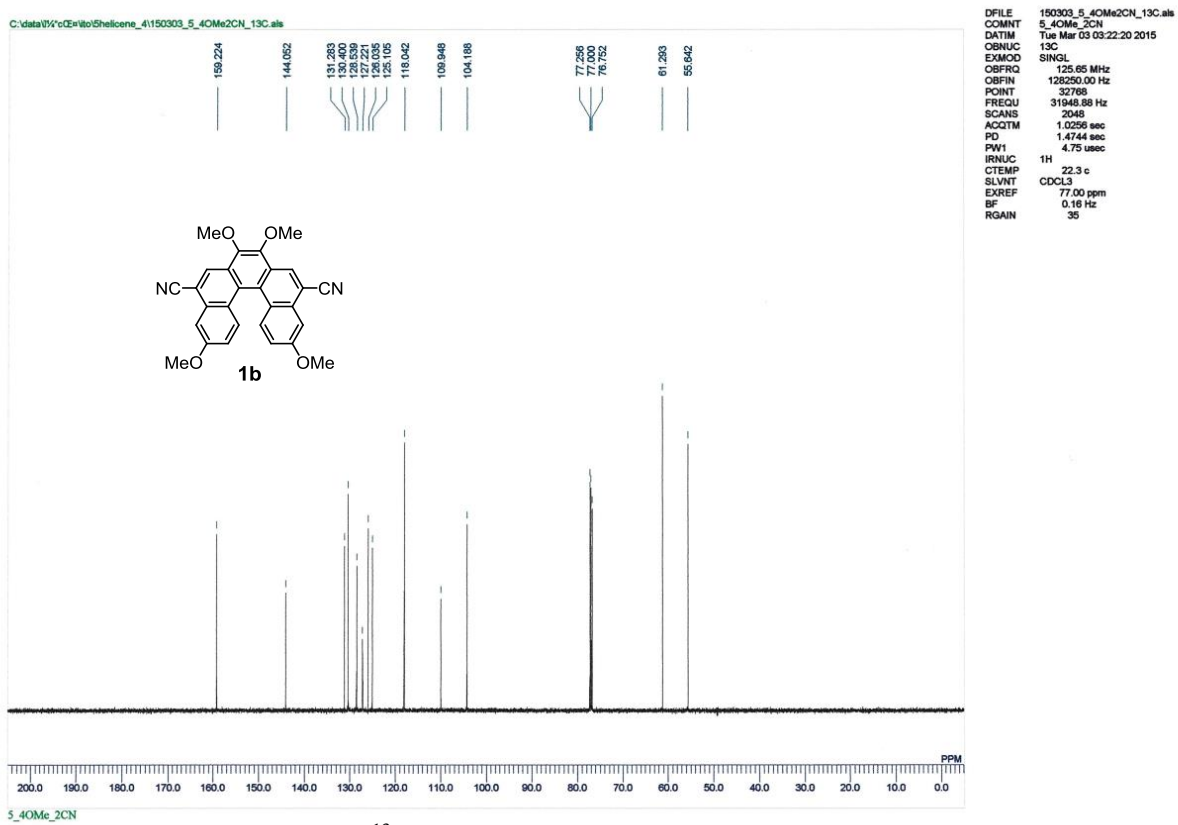

**Figure S31.**  $^{13}\text{C}$  NMR spectra of compound **1b** ( $\text{CDCl}_3$ , 126 MHz)

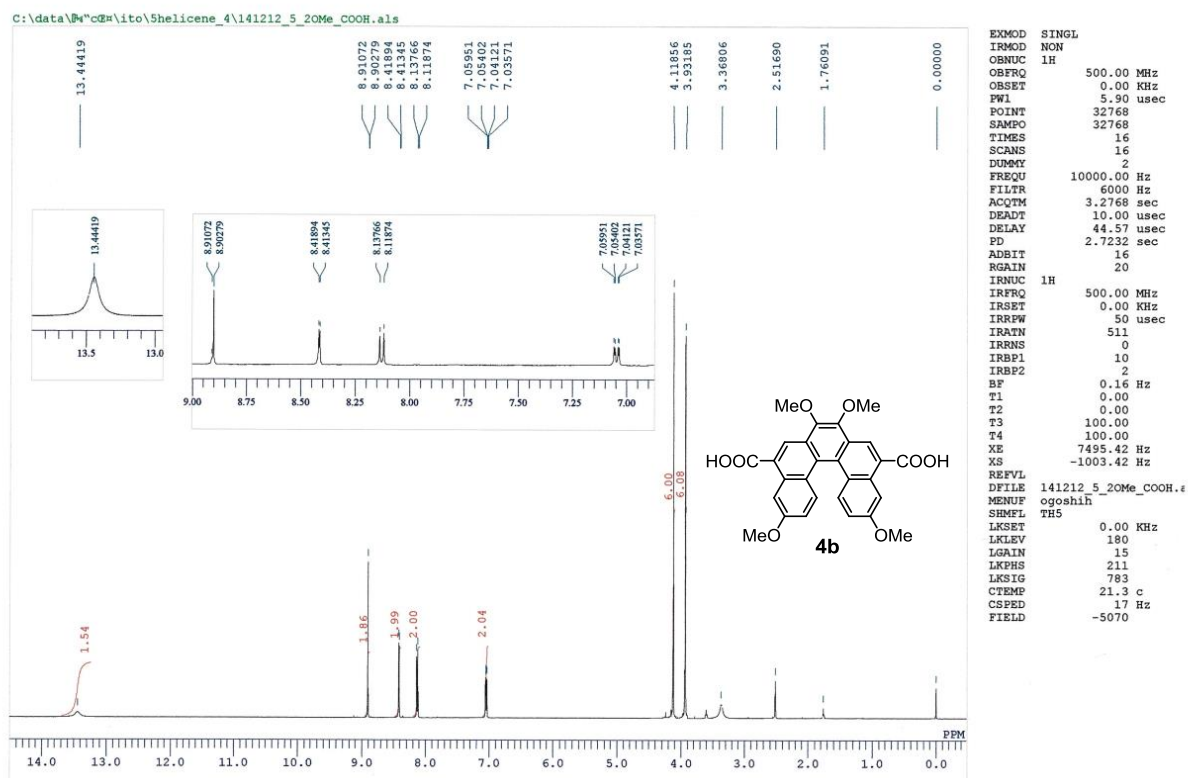

Figure S32. <sup>1</sup>H NMR spectra of compound **4b** (DMSO-*d*<sub>6</sub>, 500 MHz)

5\_2OMe\_COOH

P. 41

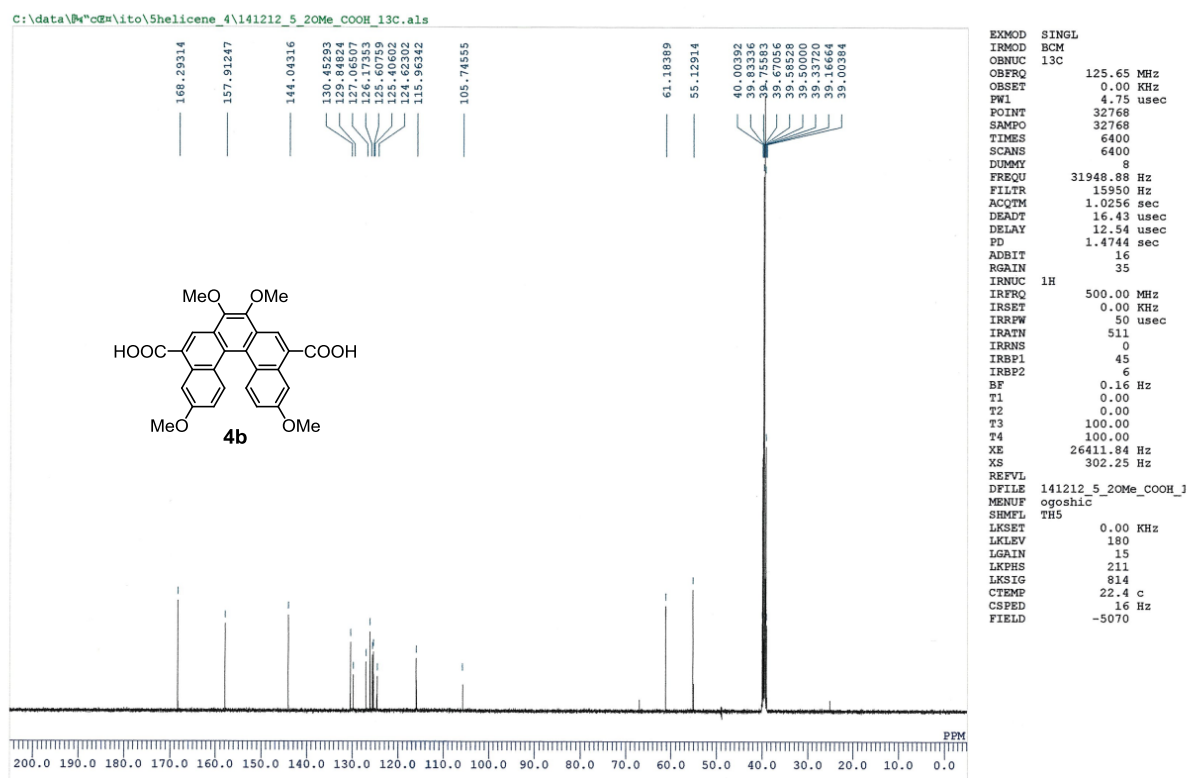

Figure S33. <sup>13</sup>C NMR spectra of compound **4b** (DMSO-*d*<sub>6</sub>, 126 MHz)

5\_2OMe\_COOH

P. 41

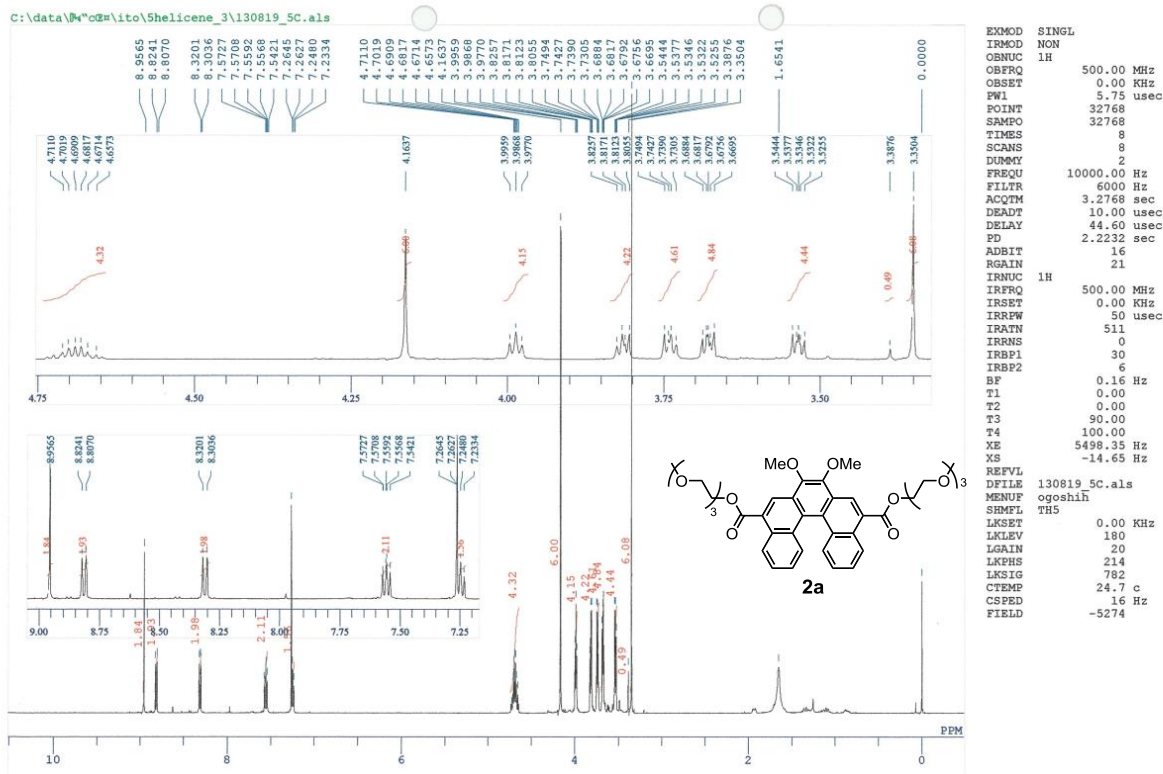

Figure S34. <sup>1</sup>H NMR spectra of compound **2a** (CDCl<sub>3</sub>, 500 MHz)

p.51

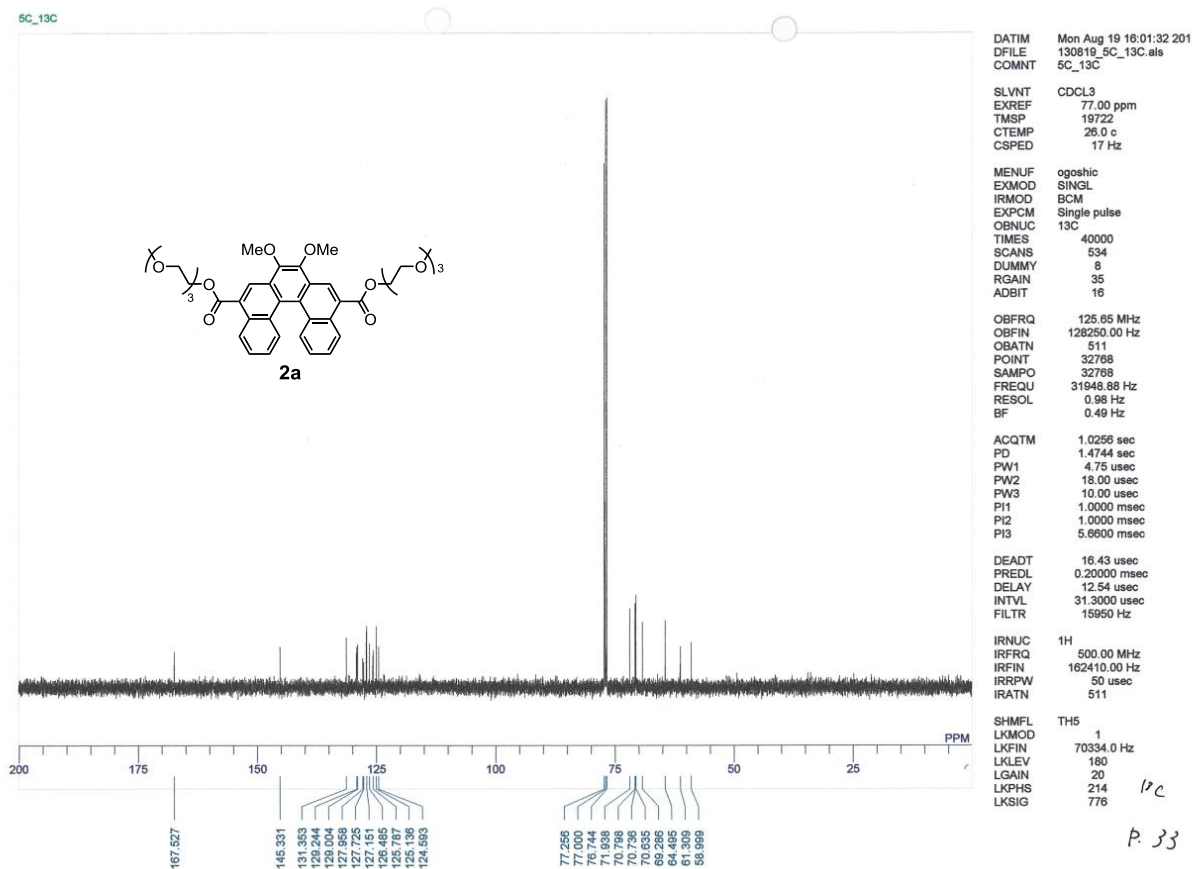

Figure S35. <sup>13</sup>C NMR spectra of compound **2a** (CDCl<sub>3</sub>, 126 MHz)

p.33







## References

- (S1) Gaussian 09, Revision C.01, M. J. Frisch, G. W. Trucks, H. B. Schlegel, G. E. Scuseria, M. A. Robb, J. R. Cheeseman, G. Scalmani, V. Barone, B. Mennucci, G. A. Petersson, H. Nakatsuji, M. Caricato, X. Li, H. P. Hratchian, A. F. Izmaylov, J. Bloino, G. Zheng, J. L. Sonnenberg, M. Hada, M. Ehara, K. Toyota, R. Fukuda, J. Hasegawa, M. Ishida, T. Nakajima, Y. Honda, O. Kitao, H. Nakai, T. Vreven, J. A. Montgomery, Jr., J. E. Peralta, F. Ogliaro, M. Bearpark, J. J. Heyd, E. Brothers, K. N. Kudin, V. N. Staroverov, T. Keith, R. Kobayashi, J. Normand, K. Raghavachari, A. Rendell, J. C. Burant, S. S. Iyengar, J. Tomasi, M. Cossi, N. Rega, J. M. Millam, M. Klene, J. E. Knox, J. B. Cross, V. Bakken, C. Adamo, J. Jaramillo, R. Gomperts, R. E. Stratmann, O. Yazyev, A. J. Austin, R. Cammi, C. Pomelli, J. W. Ochterski, R. L. Martin, K. Morokuma, V. G. Zakrzewski, G. A. Voth, P. Salvador, J. J. Dannenberg, S. Dapprich, A. D. Daniels, O. Farkas, J. B. Foresman, J. V. Ortiz, J. Cioslowski, and D. J. Fox, Gaussian, Inc., Wallingford CT, 2010.
- (S2) M. Uejima, T. Sato, D. Yokoyama, K. Tanaka, J.-W. Park, *Phys Chem. Chem. Phys.* 2014, **16**, 14244–14256.
- (S3) M. Uejima, T. Sato, K. Tanaka, H. Kaji, *Chem. Phys.* 2014, **430**, 47–55.
- (S4) Y. Nakai, T. Mori, Y. Inoue, *J. Phys. Chem. A*, 2012, **116**, 7372–7385.
- (S5) For the relationship between the sign of [5]helicene derivatives and their absolute configurations, see: Y. Shen, H.-Y. Lu, C.-F. Chen, *Angew. Chem. Int. Ed.*, 2014, **53**, 4648–4651, and references therein.
- (S6) R. H. Janke, T. Haufe, E.-U. Würthwein, J. H. Borkent, *J. Am. Chem. Soc.*, 1996, **118**, 6031–6035.
